# Supplementary material
Source: PubMed Central journal article supplement (PMC4987793)
Supplement: pnas.1604463113.sapp.pdf [file pnas.1604463113.sapp.pdf]

## 1 **Supporting Information**

2

## 3 **SI Materials and Methods**

4

### 5 **Cloning of *Mma-GluII***

6 Amplification of the *Mus musculus ganab* (isoform 2) and *prkcsH* genes (UniProt  
7 Accession numbers: Q8BHN3-2 and O08795) was achieved by polymerase chain  
8 reaction (PCR) using a standard Phusion Flash ThermoFisher Scientific) protocol and the  
9 primers: *ganab* Forward 5'-GCGTAGCTGAAACCGGCGCTGTGGATAGAA 3',  
10 Reverse 5'-GGTGGCTCCAGCTAGCTCGAAGATGAATACTCCAGTCGGATGC-3'  
11 and *prkcsH* Forward 5'-  
12 GCGTAGCTGAAACCGGCGCTGTAGAAGTTAAGAGACCCCGGGG-3', Reverse  
13 5'-GTGATGGTGATGTTTGT 3'. A DpnI digestion was performed to prevent template  
14 DNA from contaminating the newly assembled product. Purification of the PCR products  
15 was achieved by AMPure XP magnetic beads (Beckman Coulter) following the  
16 manufacturer's protocol. Assembly of the constructs was carried out by mixing 1 µl of  
17 the linearized vector (pOPINGS and pOPING for *ganab* and *prkcsH*, respectively,  
18 provided by the Oxford Protein Production Facility) with 5 µl of the purified PCR  
19 product to a total volume of 10 µl and added to lyophilized In-Fusion HD EcoDry  
20 enzyme mix (Clontech). pOPINGS bears C-terminal Strep-II and hexahistidine tags and  
21 pOPING bears a C-terminal hexahistidine tag. After the assembly reaction at 42 °C for 30  
22 min, transformation was carried out in One Shot OmniMAX 2 Chemically Competent *E.*  
23 *coli* (Life Technologies) following the manufacturer's protocol. Correctly assembled  
24 colonies were screened by blue-white selection and the plasmids were isolated.

25

### 26 **Cloning of *Mma-GluII* point mutants**

27 Site-directed mutagenesis was carried out on the wild-type *ganab* template present in  
28 Litmus28i (New England Biolabs) using the Q5 Site-Direct Mutagenesis kit (New  
29 England Biolabs) according to the manufacturer's protocol. Subcloning into the pHLsec  
30 expression vector of correctly identified mutants was then carried out using the above  
31 strategy.

32

### 33 **Expression of *Mma-GluII***

34 Co-transfection into the FreeStyle 293 Expression System (Life Technologies) was  
35 carried out according to the manufacturer's protocol. The transfection reagent was used at  
36 0.125% v/v of the culture volume. The plasmids were used in equimolar amounts at a  
37 total of 0.1% w/v of the culture volume. Cells were maintained at 37 °C, 5 % CO<sub>2</sub> and  
38 135 rpm.

39

### 40 **Purification of *Mma-GluII***

41 After 4 days the cells were harvested by centrifugation at 3000 g for 15 min. The  
42 supernatant was adjusted to 1xPBS and 5 mM imidazole. 10 M NaOH was used to bring  
43 the pH to 7.5. The supernatant was flowed through a 5 ml HisTrap excel (GE  
44 LifeSciences) column and washed with 10 column volumes 40 mM imidazole in PBS  
45 supplemented with 5% w/v glycerol. The protein was eluted with 10 column volumes of  
46 400 mM imidazole in PBS supplemented with 5% w/v glycerol. The imidazole was  
47 removed from the eluate by dialysis into Strep Wash Buffer (100 mM Tris pH 8.0, 150

48 mM NaCl, 1 mM EDTA). The *Mma*-GluII was bound to 10 ml of StrepTactin Superflow  
49 High Capacity resin (IBA). The resin was washed with 3 column volumes of the Strep  
50 Wash Buffer followed by 3 column volumes of Strep Elution Buffer (100 mM Tris pH  
51 8.0, 150 mM NaCl, 1 mM EDTA, 2.5 mM D-desthiobiotin). The pooled fractions were  
52 concentrated with 30 kDa MWCO Amicon Ultra-15 Ultrafiltration devices (Millipore).  
53 The concentrated enzyme was applied to a Superdex 200 16/600 column (GE  
54 Lifesciences) in 20 mM HEPES pH 7.5, 150 mM NaCl. The appropriate fractions were  
55 pooled and concentrated as above. Yield of the full-length *Mma*-GluII is 8mg/L of  
56 culture. Expression and purification of the point mutants was carried out in an identical  
57 manner to the wild-type albeit on a smaller scale. The removal of the polyhistidine tag  
58 from the  $\beta$ -subunit allowed a more straightforward one-step IMAC purification for the  
59 point-mutants.

60

### 61 **Trypsinolysis of *Mma*-GluII**

62 *Mma*-GluII was treated with sequencing grade modified trypsin (Promega) in a 1:100  
63 trypsin: *Mma*-GluII mass ratio, supplemented with 2 mM CaCl<sub>2</sub> for 4 h at room  
64 temperature. The trypsinized material was purified on a Superdex 200 column as above.

65

### 66 **Differential scanning fluorimetry**

67 Differential scanning fluorimetry (DSF) experiments were set up by mixing the protein of  
68 interest in the concentration range of 0.025 - 0.1 mg/ml with SYPRO Orange (Molecular  
69 Probes) at a concentration of 5X in a final volume of 50  $\mu$ l in white, polypropylene, non-  
70 skirted PCR plates (Stralab) sealed with optically-clear ThermalSealRT2 film (Alpha

71 Laboratories). All measurements were done in quadruplicate. A 25 °C to 80°C thermal  
72 ramp with 1 degree Celsius per minute was performed on a MX3005P real time PCR  
73 machine (Stratagene) measuring fluorescence with FAM and ROX filters which  
74 correspond approximately to  $\lambda_{\text{ex}}$  of 494 nm and  $\lambda_{\text{em}}$  of 602 nm.

75

## 76 **Enzymology**

### 77 **Glucose detection assay**

78 Cleavage of glucobiose disaccharides (Carbosynth) of different glycosidic linkages was  
79 performed by mixing 30  $\mu\text{l}$  of *Mm*  $\alpha$ -GluII at 60 nM and 30  $\mu\text{l}$  serially-diluted  
80 disaccharide in PCR tubes and incubating at 37 °C for 30 min. Glucose release was  
81 quantified against a 7-point D-glucose standard curve using the Amplex Red  
82 Glucose/Glucose Oxidase Assay Kit (Life Technologies) according to the manufacturer's  
83 protocol using 50  $\mu\text{l}$  of the previous reaction. Measurements at different pH were carried  
84 out as above but 3  $\mu\text{l}$  of 600 nM *Mm*  $\alpha$ -GluII was diluted into sodium phosphate buffer of  
85 appropriate pH followed by addition of 30  $\mu\text{l}$  of disaccharide at 1 mM final concentration.  
86 Measurements were subtracted from disaccharide only containing wells. A Michaelis-  
87 Menten model ( $V = [S]V_{\text{max}}/(K_{\text{m}}+[S])$ ) was fit to the graph of initial velocity *versus*  
88 substrate concentration in order to obtain the values of  $V_{\text{max}}$ ,  $K_{\text{m}}$ , and  $k_{\text{cat}}$ . A substrate  
89 inhibition model ( $V=V_{\text{max}}[S]/(K_{\text{m}}+ [S](1+[S]/K_{\text{i}}))$ ) was fitted to the nigerose curve.

90

### 91 **Continuous $\alpha$ -glucosidase II assay**

92 The rates of 4-methylumbelliferyl  $\alpha$ -D-glucopyranoside (4-MUG) (Sigma-Aldrich)  
93 hydrolysis by *Mma*-GluII were measured mixing a 50  $\mu\text{l}$  sample with 50  $\mu\text{l}$  of 4-MUG

94 and incubating at 37 °C in 96-well black non-binding surface treated microplates  
95 (Corning). Fluorescence was measured continuously for 30 min at  $\lambda_{\text{ex}}$  of 355 nm and  $\lambda_{\text{em}}$   
96 of 460 nm on a SpectraMax M5 (Molecular Devices) with 40 scans per well, low  
97 photomultiplier tube sensitivity and an emission cut-off filter of 455 nm. A *Mm* $\alpha$ -GluII  
98 concentration of 20 nM provided the best signal over the course of the assay. 100 mM  
99 potassium phosphate buffer at pH 7.2 was used for all dilutions. 4-Methylumbelliferone  
100 (4-MU) quantitation was achieved with a five-point standard curve also containing the  
101 enzyme. A Michaelis-Menten model ( $V = [S]V_{\text{max}}/(K_m+[S])$ ) was fit to the graph of  
102 initial velocity *versus* substrate concentration in order to obtain the values of  $V_{\text{max}}$ ,  $K_m$ ,  
103 and  $k_{\text{cat}}$ .

104

#### 105 **Purification of oligosaccharide substrates**

106 Free oligosaccharide (FOS) substrates,  $\text{Glc}_{(1-3)}\text{Man}_{(4-7)}\text{GlcNAc}_{(1-2)}$  were isolated from  
107 cultured cells treated with NB-DNJ to prevent endogenous removal of glucoses from the  
108 glycans and purified by normal-phase high-performance liquid chromatography (NP-  
109 HPLC). These oligosaccharides are liberated from the proteins they were attached to  
110 during proteasomal degradation resulting in free glycans in the cell (1). HL60 or CHO  
111 cells were cultured to high density ( $1 \times 10^7$  cells/ml) prior to growth in fresh medium  
112 containing 1 mM NB-DNJ (gifted from Oxford GlycoSciences Ltd.). Following cell  
113 culture, the medium was removed and the cells were washed 3 times with PBS by  
114 centrifugation. Washed cells were stored at -20 °C for a short time before thawing and  
115 subjected to Dounce homogenization in water. The maximum recovery of FOS was  
116 performed using the following conditions. The homogenate from  $1-2 \times 10^6$  cells (0.1-0.2

117 mg protein) was desalted and deproteinated using solid phase extraction (SPE) by  
118 passage through a mixed-bed ion-exchange column (0.2 ml AG50W-X12 (H<sup>+</sup>, 100-200  
119 mesh, BioRad) over 0.4 ml AG3-X4 (O<sup>-</sup>, 100-200 mesh, BioRad)), pre-equilibrated with  
120 water (5 × 1 ml). The homogenate was added to the column which was washed with 4 × 1  
121 ml water, and this eluate containing the FOS was collected. The extracted, purified FOS  
122 were then dried by lyophilization.

123

124 An alternative method to obtain high mannose Glc<sub>2</sub>Man<sub>9</sub>GlcNAc<sub>2</sub> glycan was through  
125 recombinant methods. Transient transfection of HIV gp120 (Bal) in pHLsec was  
126 conducted in ExpiCHO (Life Technologies) cells according to the manufacturer's  
127 protocol. At the time of transfection, the media was supplemented with 10 μM  
128 kifunensine and 200 μM NB-DNJ to ensure the *N*-linked glycans on the protein were all  
129 high-mannose glycans. The cells were harvested after seven days by centrifugation at  
130 3000 g for 15 min. The protein was purified by immobilized metal affinity  
131 chromatography analogously to what described for *Mma*-GluII above and the eluate was  
132 dialyzed into PBS before lyophilization. Glycan (Glc<sub>3</sub>Man<sub>9</sub>GlcNAc<sub>2</sub>) was released from  
133 the freeze-dried purified recombinant gp120 (kif + NB-DNJ treated) with PNGaseF (New  
134 England Biolabs) under non-denaturing conditions. Briefly, after resuspending in NEB  
135 Glyco Buffer2, PNGaseF was added at 5,000 U/ml and incubated 37°C for 24 hours. The  
136 PNGase F digest mix (gp120+glycan) was treated with 60 μL of *Mma*-GluI at 4 mg/ml at  
137 37 °C for 48 h, to remove the outer Glc residue off the glycan. Proteins were removed by  
138 passing the mix through a MultiScreen-IP Filter Plate, 0.45 μm (Millipore). The free  
139 glycan Glc<sub>2</sub>Man<sub>9</sub>GlcNAc<sub>2</sub> was lyophilized before fluorescent 2-AA labeling.

140

141

142 **2AA-labeling of oligosaccharide substrates**

143 The free oligosaccharides were labeled with anthranilic acid (2-AA) (Sigma-Aldrich) and  
144 purified using Spe-ed amide 2 SPE cartridges (Applied Separations). Anthranilic acid (30  
145 mg/ml) was dissolved in a solution of 4% (w/v) sodium acetate-trihydrate and boric acid  
146 (2% w/v) in methanol. This solution was added to solid sodium cyanoborohydride (final  
147 concentration 45 mg/ml) (Sigma-Aldrich) and mixed to give the final labeling mixture.

148 A sample of free oligosaccharide (30  $\mu$ l) was added to 80  $\mu$ l of labeling mixture and  
149 placed at 80 °C for 45-60 min. The reaction was allowed to cool to room temperature and  
150 1 ml acetonitrile/water (95:5, v/v) added and vortexed.

151

152 **Purification of 2AA-labeled oligosaccharide substrates**

153 Labeled oligosaccharides were purified by adsorption to Speed-amide SPE columns,  
154 washed with acetonitrile/water 95:5 (v/v), and eluted with 2 ml water. Labeled  
155 oligosaccharides in 50 mM Tris/HCl buffer, pH 7.2 were further purified using a  
156 Concanavalin A (ConA)–Sepharose 4B (Sigma-Aldrich) column (100 $\mu$ l packed resin).  
157 The column was pre-equilibrated with 2  $\times$  1 ml water followed by 1 ml of 1 mM MgCl<sub>2</sub>,  
158 1 mM CaCl<sub>2</sub> and 1 mM MnCl<sub>2</sub> in water and finally 2 x 1 ml 50 mM Tris/HCl buffer, pH  
159 7.2. An aliquot of 2-AA labeled oligosaccharide was added and allowed to pass through  
160 the column before washing with 2 x 1 ml 50 mM Tris/HCl buffer, pH 7.2. The ConA-  
161 bound, free oligosaccharides were then eluted with 2 x 1 ml hot (70°C) 0.5 M methyl  $\alpha$ -D-  
162 mannopyranoside (Sigma-Alrich) in 50 mM Tris/HCl buffer, pH 7.2. Methyl  $\alpha$ -D-

163 mannopyranoside was removed from ConA-sepharose-purified 2-AA-labeled  
164 oligosaccharides in readiness for preparative isolation using porous graphitized carbon  
165 (PGC) SPE chromatography. A 1 ml (25 mg) PGC column (Thermo Electron) was pre-  
166 equilibrated with 1 ml methanol, followed by 1 ml water, 1 ml acetonitrile containing  
167 0.1% trifluoroacetic acid (TFA) and, finally, 2 x 0.5 ml water. After sample loading the  
168 column was washed with 2 x 0.5 ml water before oligosaccharides were eluted with 2 ml  
169 50% acetonitrile containing 0.1% TFA. The final purity of the labeled glycans was  
170 greater than 95%.

171

172 **Cleavage and detection of glycans by normal-phase high-performance liquid**  
173 **chromatography**

174 The 2-AA-labeled glycans were mixed with varying concentrations of *Mma*-GluII at 37  
175 °C and incubated for at least 3 h. The reaction was stopped with the addition of 30 µl  
176 acetonitrile. Ultrafiltration in a 10 kDa MWCO device (Millipore) was done at 7,000 g  
177 for 45 min to separate the glycans from the enzyme. The filtrate was applied to a TSKgel  
178 Amide-80 column (Tosoh Bioscience) for NP-HPLC analysis on a Waters Alliance 2695  
179 separations module with an in-line Waters 474 fluorescence detector set at  $\lambda_{\text{ex}}$  of 360 nm  
180 and  $\lambda_{\text{em}}$  of 425 nm. All chromatography was performed at 30 °C. Solvent A was  
181 composed of 20% 100 mM  $\text{CH}_3\text{CO}_2\text{NH}_4$ , pH 3.85, in Milli-Q water and 80% acetonitrile.  
182 Solvent B is composed of 20% 100 mM  $\text{CH}_3\text{CO}_2\text{NH}_4$ , pH 3.85, in Milli-Q water, 60%  
183 Milli-Q water and 20% acetonitrile. A linear gradient from 86% A to 54.7% A over 31.5  
184 min at 0.8 ml/min was used to separate the glycans. Gradient conditions were as follows:  
185 time = 0 min ( $t = 0$ ), 86% solvent A (0.8 ml/min);  $t = 6$ , 86% solvent A (0.8 ml/min);  $t =$



186 35, 54.7% solvent A (0.8 ml/min); t = 37, 5% solvent A (1 ml/min); t = 39, 5% solvent A  
187 (0.8 ml/min); t = 41, 86% solvent A (1 ml/min); t = 42, 86% solvent A (1 ml/min); t = 54,  
188 86% solvent A (1.2 ml/min); t = 55, 86% solvent A (0.8 ml/min). Samples were injected  
189 in Milli-Q water/acetonitrile (3:7, v/v). Glucose units (GU) were determined, following  
190 comparison with a 2-AA-labeled glucose oligomer ladder (derived from a partial  
191 hydrolysate of dextran) external standard using Peak Time software (developed in-  
192 house). Glucosylated oligosaccharides were identified from the characteristic elution  
193 times (GU value) and collected separately.

194

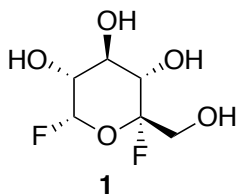

196 **5-fluoro- $\alpha$ -D-glucopyranosyl fluoride (1):** 2,3,4,6-tetra-*O*-acetyl-5-fluoro- $\alpha$ -D-  
197 glucopyranosyl fluoride (126 mg, 342  $\mu$ mol, 1.0 equiv, prepared from 2,3,4,6-tetra-*O*-  
198 acetyl- $\alpha$ -D-glucosyl fluoride as previously described (2, 3)) was cooled to 0 °C (ice/H<sub>2</sub>O  
199 bath) and dissolved in NH<sub>3</sub> solution (7 M in MeOH, 8 mL). The ice bath was removed,  
200 and the reaction mixture was stirred at room temperature for 3 h. The reaction mixture  
201 was concentrated under reduced pressure and purified by flash column chromatography  
202 (SiO<sub>2</sub>, EtOAc:MeOH = 49:1) to provide **1** (56.5 mg, 282  $\mu$ mol, 82% yield) as a pale  
203 brown oil. NMR characterisation was performed on a Varian Unity Inova 500 instrument,  
204 using residual undeuterated solvent as a reference (4). **1**:  $R_f$  = 0.18 (SiO<sub>2</sub>, EtOAc:MeOH  
205 = 49:1); <sup>1</sup>H NMR (500 MHz, CD<sub>3</sub>OD) (Fig. S9A)  $\delta$  = 5.66 (dd,  $J$  = 56.1, 1.7 Hz, 1 H),

206 3.93 (dd,  $J = 17.9, 12.6$  Hz, 1 H), 3.84 – 3.72 (m, 3 H), 3.67 (dd,  $J = 22.5, 12.7$  Hz, 1 H)  
207 ppm;  $^{13}\text{C}$  NMR (125 MHz,  $\text{CD}_3\text{OD}$ )  $\delta = 115.3$  (d,  $J = 220.0$  Hz), 107.7 (dd,  $J = 223.4,$   
208 4.7 Hz), 74.3 (d,  $J = 31.9$  Hz), 72.8 (dd,  $J = 3.9, 1.1$  Hz), 71.7 (d,  $J = 22.5$  Hz), 64.1 (d,  $J$   
209 = 26.1 Hz).

210

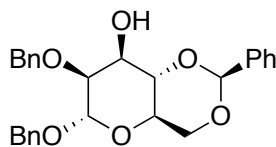

211

212 **Benzyl 2-*O*-benzyl-4,6-*O*-benzylidene- $\alpha$ -D-mannopyranoside:** To a solution of benzyl  
213 4,6-*O*-benzylidene- $\alpha$ -D-mannopyranoside (2.92 g, 8.15 mmol, 1.0 equiv, prepared from  
214 D-mannose as previously described (5)) in  $\text{CH}_2\text{Cl}_2$  (283 mL) were added  $n\text{-Bu}_4\text{NHSO}_4$   
215 (3.04 g, 8.96 mmol, 1.1 equiv) and benzyl bromide (1.06 mL, 8.96 mmol, 1.1 equiv).  
216 Finally, aq. NaOH (30% w/v, 23.5 mL) was added. The biphasic mixture was heated to  
217 reflux (55 °C, oil bath) and stirred vigorously at the same temperature for 18 h. After  
218 cooling to 25 °C, the layers were separated. The organic layer washed with  $\text{H}_2\text{O}$  (100  
219 mL), sat. aq.  $\text{NaHCO}_3$  (100 mL), and brine (100 mL), dried ( $\text{MgSO}_4$ ), filtered and  
220 concentrated under reduced pressure. The crude mixture was purified by flash column  
221 chromatography ( $\text{SiO}_2$ , EtOAc:petroleum spirits = 1:9) to provide benzyl 2-*O*-benzyl-4,6-  
222 *O*-benzylidene- $\alpha$ -D-mannopyranoside (1.53 g, 3.41 mmol, 42% yield) as a colourless oil.  
223 NMR characterisation was performed on a Varian Unity Inova 500 instrument, using  
224 residual undeuterated solvent as a reference (4). **Benzyl 2-*O*-benzyl-4,6-*O*-benzylidene-**  
225  **$\alpha$ -D-mannopyranoside:**  $R_f = 0.19$  ( $\text{SiO}_2$ , EtOAc:petroleum spirits = 4:1);  $^1\text{H}$  NMR (500  
226 MHz,  $\text{CDCl}_3$ )  $\delta = 7.52 - 7.47$  (m, 2 H), 7.42 – 7.28 (m, 13 H), 5.58 (s, 1 H), 4.94 (s, 1 H),

227 4.73 (d,  $J = 11.9$  Hz, 1 H), 4.71 (AB d,  $J = 11.9$  Hz, 1 H), 4.67 (AB d,  $J = 11.9$  Hz, 1 H),  
228 4.49 (d,  $J = 11.9$  Hz, 1 H), 4.24 (d,  $J = 5.9$  Hz, 1 H), 4.18 – 4.13 (m, 1 H), 3.94 (t,  $J = 9.2$   
229 Hz, 1 H), 3.89 – 3.80 (m, 3 H), 2.35 (d,  $J = 7.4$  Hz, 1 H) ppm;  $^{13}\text{C}$  NMR (125 MHz,  
230  $\text{CDCl}_3$ )  $\delta = 137.8, 137.6, 137.2, 129.3, 128.79, 128.76, 128.5, 128.3, 128.21, 128.19,$   
231  $128.1, 126.5, 102.3, 97.9, 79.8, 78.8, 78.7, 74.0, 69.6, 69.0, 64.0, 60.6$  ppm.

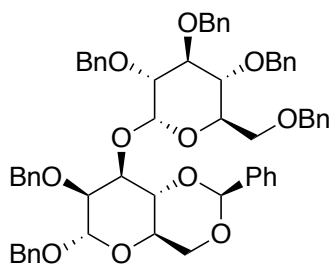

232

233 **Benzyl *O*-(2,3,4,6-tetra-*O*-benzyl- $\alpha$ -D-glucopyranosyl)-(1 $\rightarrow$ 3)-2-*O*-benzyl-4,6-*O*-**

234 **benzylidene- $\alpha$ -D-mannopyranoside:** To a solution of benzyl 2-*O*-benzyl-4,6-*O*-

235 benzylidene- $\alpha$ -D-mannopyranoside (1.53 g, 3.41 mmol, 1.0 equiv) and 2,3,4,6-tetra-*O*-

236 benzyl- $\alpha$ -D-glucopyranosyl trichloroacetimidate (3.04 g, 4.43 mmol, 1.3 equiv) in  $\text{Et}_2\text{O}$

237 (75 mL) was added freshly activated 3 Å molecular sieves (1.5 g). The mixture was

238 cooled to  $-30$  °C (dry ice/acetone bath) and stirred for 30 min at the same temperature. At

239 the same temperature, trimethylsilyltriflate (620  $\mu\text{L}$ , 3.41 mmol, 1.0 equiv) was added

240 dropwise. The mixture was stirred at the same temperature for 20 hours. The reaction

241 mixture was diluted with  $\text{EtOAc}$  (300 mL) and filtered through a pad of celite. The filtrate

242 was washed with brine ( $3 \times 100$  mL), dried ( $\text{MgSO}_4$ ), filtered and concentrated under

243 reduced pressure. The crude mixture was purified by flash column chromatography

244 ( $\text{SiO}_2$ ,  $\text{EtOAc}$ :petroleum spirits = 1:9) followed by a second flash column

245 chromatography ( $\text{SiO}_2$ , petroleum spirits: $\text{CH}_2\text{Cl}_2$  = 2:8  $\rightarrow$  1:9) to provide benzyl *O*-

246 (2,3,4,6-tetra-*O*-benzyl- $\alpha$ -D-glucopyranosyl)-(1 $\rightarrow$ 3)-2-*O*-benzyl-4,6-*O*-benzylidene- $\alpha$ -D-  
247 mannopyranoside (1.04 g, 1.08 mmol, 32% yield) as a colourless oil that crystallised on  
248 standing. NMR characterisation was performed on a Varian Unity Inova 500 instrument,  
249 using residual undeuterated solvent as a reference (4). **1**:  $R_f = 0.21$  (SiO<sub>2</sub>,  
250 EtOAc:petroleum spirits = 4:1); <sup>1</sup>H NMR (500 MHz, CDCl<sub>3</sub>)  $\delta = 7.44 - 7.41$  (m, 2 H),  
251 7.39 - 7.13 (m, 31 H), 7.04 - 7.00 (m, 2 H), 5.56 (d,  $J = 3.5$  Hz, 1 H), 5.48 (s, 1 H), 4.98  
252 (d,  $J = 11.0$  Hz, 1 H), 4.93 (br s, 1 H), 4.91 (d,  $J = 12.0$  Hz, 1 H), 4.86 (d,  $J = 11.0$  Hz, 1  
253 H), 4.77 (d,  $J = 8.7$  Hz, 1 H), 4.74 (d,  $J = 7.6$  Hz, 1 H), 4.71 (d,  $J = 12.9$  Hz), 4.58 (d,  $J =$   
254 12.3 Hz, 1 H), 4.51 (d,  $J = 12.3$  Hz, 1 H), 4.49 - 4.35 (m, 4 H), 4.33 (d,  $J = 12.3$  Hz, 1 H),  
255 4.20 (dd,  $J = 9.9, 4.6$  Hz, 1 H), 4.01 (t,  $J = 9.2$  Hz, 1 H), 3.93 (td,  $J = 10.1, 4.6$  Hz, 1 H),  
256 3.89 - 3.80 (m, 3 H), 3.70 - 3.62 (m, 2 H), 3.60 (t,  $J = 9.5$  Hz, 1 H), 3.54 (dd,  $J = 9.7, 3.7$   
257 Hz, 1 H) ppm; <sup>13</sup>C NMR (125 MHz, CDCl<sub>3</sub>)  $\delta = 138.9, 138.7, 138.4, 138.2, 138.1, 137.6,$   
258 137.2, 129.3, 128.59, 128.57, 128.5, 128.44, 128.40, 128.37, 128.35, 128.3, 128.22,  
259 128.19, 128.1, 128.03, 128.00, 127.98, 127.95, 127.92, 127.89, 127.85, 127.8, 127.74,  
260 127.66, 127.63, 127.57, 127.3, 126.6, 102.5, 98.8, 97.1, 81.5, 79.9, 79.2, 77.9, 77.6, 75.6,  
261 75.1, 74.0, 73.5, 73.0, 71.0, 70.8, 69.3, 69.0, 68.7, 64.4 ppm.

262

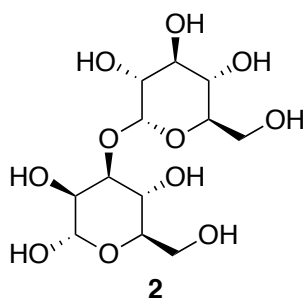

264  **$\alpha$ -D-Glucopyranosyl-(1 $\rightarrow$ 3)-D-mannopyranose (2):** Benzyl *O*-(2,3,4,6-tetra-*O*-benzyl-  
265  $\alpha$ -D-glucopyranosyl)-(1 $\rightarrow$ 3)-2-*O*-benzyl-4,6-*O*-benzylidene- $\alpha$ -D-mannopyranoside (670  
266 mg, 690  $\mu$ mol, 1.0 equiv) was dissolved in MeOH (250 mL). Pd/C (10% Pd, 200 mg, 30  
267 weight-%) and Pd(OH)<sub>2</sub>/C (10% Pd(OH)<sub>2</sub>, 200 mg, 30 weight-%) were added. The  
268 mixture was stirred under an atmosphere of H<sub>2</sub> for 16 h. The reaction mixture was filtered  
269 through celite and concentrated under reduced pressure to provide **2** (212 mg, 619  $\mu$ mol,  
270 90% yield) as an approx. 2:1 mixture of anomers as a clear, colourless oil. NMR  
271 characterisation was performed on a Varian Unity Inova 500 instrument, using residual  
272 undeuterated solvent as a reference (4). **2**: <sup>1</sup>H NMR (500 MHz, D<sub>2</sub>O) (Fig. S9B)  $\delta$  = 5.34  
273 – 5.30 (m, 1 H), 5.23 (s, 0.63 H), 4.99 (s, 0.37 H), 4.18 – 4.15 (m, 1 H), 4.05 – 3.98 (m, 1  
274 H), 3.97 – 3.79 (m, 8 H), 3.64 (dd, *J* = 10.0, 3.7 Hz, 1 H), 3.52 – 3.46 (m, 1 H) ppm; <sup>13</sup>C  
275 NMR of major anomer (125 MHz, D<sub>2</sub>O)  $\delta$  = 101.2, 94.6, 78.9, 73.5, 73.1, 73.0, 72.4,  
276 71.2, 70.2, 66.8, 61.5, 61.2 ppm. <sup>13</sup>C NMR of minor anomer (125 MHz, D<sub>2</sub>O)  $\delta$  = 101.0,  
277 94.2, 82.4, 81.5, 76.6, 73.5, 72.4, 71.8, 70.3, 66.6, 61.6, 61.2 ppm.

278

## 279 **X-ray crystal structures determination**

### 280 **Crystal growth**

281 All crystallization solutions were purchased from Molecular Dimensions. Filtered *Mma*-  
282 GluII<sub>Tryps</sub> at 5.6 mg/ml was crystallized by vapor diffusion with 21% v/v ethylene glycol,  
283 11% w/v PEG 8000 (from the Morpheus Precipitant Mix 2), 50 mM Morpheus  
284 carboxylic acids mix, 100 mM Morpheus buffer system 1 pH 6.25 (all solutions from  
285 Molecular Dimensions) in a 3:1 protein:precipitant ratio. 200  $\mu$ m long rods formed after  
286 about one week at 18 °C. Crystals were transferred into a solution of 16% w/v PEG 8000,

287 50 mM Morpheus carboxylic acids mix, and 100 mM Morpheus buffer system 2 pH 7.2,  
288 20% v/v PEG 400 with or without ligands before cooling in liquid nitrogen. All ligands  
289 were sourced from Sigma with the exception of 5-fluoro- $\alpha$ -D-glucopyranosyl fluoride  
290 (see above synthesis), NB-DNJ (gifted from Oxford GlycoSciences Ltd.), and MON-  
291 DNJ, which was synthesized and spectroscopically identical to previous reports.  
292 (European Patent Office Publication WO2010096764 (A1)). The D-glucal soak was  
293 performed by transferring a crystal to the mother liquor with 15% w/v D-glucal dissolved  
294 beforehand. The remaining soaks were performed at the following concentrations: 10  
295 mM glucose, 20 mM 5-fluoro- $\alpha$ -D-glucopyranosyl fluoride, 10 mM castanospermine, 50  
296 mM DNJ, 10 mM NB-DNJ and 10 mM MON-DNJ. Iminosugar soaks were performed  
297 overnight whereas all others were cryo-cooled within 15 minutes.

298

### 299 **X-ray diffraction**

300 Diffraction from *Mma*-GluII<sub>Tryps</sub> crystals was measured at the Diamond Light Source  
301 (DLS), Harwell, England, UK, except for the apo and NB-DNJ structures, data for which  
302 were collected respectively on beamlines ID30-1 and BM14 at the ESRF, Grenoble,  
303 France. All experiments were carried out at T = 90 K in a stream of cryogenic N<sub>2</sub> gas.  
304 Beamlines and wavelengths: Apo: ID30-1@ESRF,  $\lambda = 0.96597 \text{ \AA}$ ; Glucal soak:  
305 I02@DLS,  $\lambda = 0.97910 \text{ \AA}$ ; 5F-Glucosyl fluoride soak: I03@DLS,  $\lambda = 1.07227 \text{ \AA}$ ;  
306 Glucose soak: I04@DLS,  $\lambda = 0.97949 \text{ \AA}$ ; castanospermine and DNJ: I04@DLS,  $\lambda =$   
307  $0.97950 \text{ \AA}$ ; NB-DNJ: BM14@ESRF,  $\lambda = 0.97880 \text{ \AA}$ ; MON-DNJ: I02@DLS,  $\lambda = 1.0721$   
308  $\text{ \AA}$ .

309

### 310 **Data processing, structure determination and refinement**

311 X-ray diffraction images were processed using the autoPROC (6) or the xia2 (7) suite of  
312 programs, which index and integrate with XDS (8), and were scaled and merged using  
313 the CCP4 (9) suite of programs, Pointless, Aimless and Truncate. Molecular replacement  
314 leading to structure determination of the apo form was performed with Phaser (10) also  
315 part of the CCP4 suite, run with the automated MR pipeline MrBUMP (11), using chain  
316 A of the PDB entry 3L4Z as a search model. Model building was performed with Coot  
317 and Buccaneer (12, 13), and refinement with autoBUSTER, using LSSR restraints (14,  
318 15). Model validation was carried out with internal modules of Coot and through the  
319 MolProbity server (16). Initial sets of phases for the 5F-glucosyl fluoride, glucal, glucose  
320 and iminosugar soaks were obtained by molecular replacement from the apo structure.  
321 Idealized coordinates and stereochemical dictionaries for ligands not present in the  
322 autoBUSTER libraries and non-standard ligands were generated using the GRADE server  
323 starting from SMILES strings (<http://grade.globalphasing.org/>). Each ligand was docked  
324 in the unbiased Fo-Fc difference electron density map calculated from the phases at the  
325 end of the iterative protein-only model building and refinement, and the GRADE-  
326 generated stereochemical dictionary was used in Coot to fit the ligand to the difference  
327 map, varying its conformations around its torsional degrees of freedom. A final round of  
328 refinement of the protein and docked ligand utilized ligand stereochemical restraints from  
329 the GRADE-generated dictionary. All figures were produced in PyMOL.

330

### 331 **Hydrogen-deuterium exchange mass spectrometry**

332 HDX experiments were performed using a Waters HDX Manager and Acquity UPLC M-  
333 Class system coupled to a Synapt G2Si instrument (Waters). The UPLC system consisted

334 of an in-line pepsin column (Enzymate BEH 5 $\mu$ m, 2.1 x 30mm, Waters), C18 trap  
335 column (Acquity UPLC BEH C18 1.7 $\mu$ m VanGaurd, Waters) and C18 analytical column  
336 (Acquity UPLC BEH C18 1.7 $\mu$ m, 1 x 100 mm, Waters). Samples were diluted to 10 $\mu$ M  
337 in 50mM HEPES, 150mM NaCl pH7 and kept at 1 °C until D<sub>2</sub>O labeling. Labeling was  
338 done at 20 °C from 15 s to 60 min (15 s, 30 s, 1 min, 5 min, 10 min, 30 min, 60 min time  
339 points). The labeling solution was 50 mM HEPES, 150 mM NaCl in 99.99% D<sub>2</sub>O pH 6.6  
340 and samples were quenched with a 50 mM HEPES, 150 mM NaCl pH 1.2 solution.  
341 Samples were digested for 2 min at 20 °C and desalted on the trap column at a flow rate  
342 of 40  $\mu$ l/min (95% buffer A; 0.1% formic acid in water and 5% buffer B; 0.1% formic  
343 acid in acetonitrile) at 0 °C. Digested peptides were eluted over the analytical column to  
344 the mass spectrometer over a 10 min gradient (5% to 35% buffer B) at 40  $\mu$ l/min. The  
345 mass spectrometer was set for positive ions detection in ToF mode. Data was acquired  
346 with MassLynx 4.1 software and analyzed with ProteinLynx Global Server and DynamX  
347 software (Waters).

348

#### 349 ***At* $\alpha$ -GluII in *planta***

#### 350 **RNA isolation and cloning of fluorescent constructs**

351 Total RNA was isolated from *A. thaliana* Col-0 leaves using the Plant RNA purification  
352 reagent (Invitrogen) and cDNA synthesis was performed using Super script III First-  
353 Strand Synthesis System (Invitrogen). The full-length coding sequence of *At*GluII $\alpha$  and  
354 *At*GluII $\beta$  were amplified by PCR using the Accuprime Pfx DNA Polymerase  
355 (Invitrogen), cloned into pENTR-D Topo vector (Invitrogen) and sequenced.

356 *At*GluII $\alpha$  mutants were generated by fusion of two separate PCR products via overlapping



357 primers as described in (17), cloned into pENTR-D Topo vector and sequenced. DNA  
358 primers for cloning and mutagenesis:  
359 *AtGluII $\alpha$*  F: caccATGAGATCTCTTCTCTTTGTAC;  
360 *AtGluII $\alpha$*  R: CAGAATCTTTACGGTCCAG;  
361 *AtGluII $\beta$*  F: caccATGAGAGTAGTAGTAATATCTTC;  
362 *AtGluII $\beta$*  R: TCAGAGTTCGTCGTGATTCTGAGG;  
363 *AtGluII $\alpha$* <sup>R787E</sup> F: GGAAGGACCGGTTTAGGgaAAGTTCCTCTCAAATGGAC;  
364 *AtGluII $\alpha$* <sup>R787E</sup> R: GTCCATTTGAGAGGAACTTtcCCTAAACCGGTCCTTCC;  
365 *AtGluII $\alpha$* <sup>R787E/R784E</sup> F: CCAAGGAAGGACgaGTTTAGGgaAAGTTCCTCTCAAATG;  
366 *AtGluII $\alpha$* <sup>R787E/R784E</sup> R: CATTGAGAGGAACTTtcCCTAAAcGTCCTTCCTTGG.  
367 *AtGluII $\alpha$*  wild-type and mutants were fused at the C-terminal with the enhanced GFP  
368 (eGFP), using the pK7FWG2 binary vector. The *AtGluII $\alpha$*  double mutant was also fused  
369 at the C-terminal with the monomeric RFP (mRFP) into the pB7RWG2 binary vector  
370 whereas *AtGluII $\beta$*  was fused at the N-terminal with mRFP using the pH7WGR binary  
371 vector, using LR Gateway technology (Invitrogen). Binary vectors, containing each  
372 construct, were cloned and then amplified in *Escherichia coli* DH5 $\alpha$  before  
373 transformation in *Agrobacterium tumefaciens* (strain GV3101).

374

### 375 **Plant materials and growth conditions**

376 Transient transformation of 4-5 weeks old tobacco leaf epidermal cells (*Nicotiana*  
377 *tabacum* plants, cv Petit Havana) was performed. Plants were grown at 25 °C, 14 h light,  
378 10 h dark and were used for *Agrobacterium tumefaciens* (strain GV3101)-mediated

379 transient expression (18, 19). The bacterial optical density (OD<sub>600</sub>) used for plant  
380 transformation was 0.5 for all constructs.

381

### 382 **Confocal laser scanning microscopy**

383 An inverted laser scanning confocal microscope (LSM Pascal; Carl Zeiss) was used for  
384 confocal analyses. Imaging of *AtGluIIα*-GFP and *AtGluIIα*-GFP single mutants were  
385 performed using 488 nm excitation of an Argon ion laser, 25 mW. Imaging of *AtGluIIα*-  
386 RFP double mutant and *AtGluIIβ*-RFP were performed using a 543 nm excitation He/Ne  
387 laser, 50mW. GFP was detected with a 505–530 nm filter set whereas RFP was detected  
388 with a 560–615 nm filter set. A 488/543/633 beam splitter was used for acquisition.

389 Imaging was performed using 40x Zeiss plan-neofluar oil, 1.3 NA, DIC.

390

### 391 **Protein extraction and (co-)immunoprecipitation**

392 Agrobacterium-infiltrated tobacco leaves were used to prepare total protein extracts.  
393 Total extracts were prepared as previously described (20). Adult leaves (approximately 1  
394 g) from 4-week-old plants were frozen in liquid nitrogen, homogenized with mixer mill  
395 MM301 (Retsch) for 1 min at 30 Hz and taken up in cold extraction buffer [50 mM Tris-  
396 HCl pH 8, 150 mM NaCl, 10% glycerol, 1% w/v Nonidet P-40, 10 mM EDTA, 1 mM  
397 PMSF protease inhibitor mixture (Sigma)]. After incubation for 2 h at 4 °C with gentle  
398 shaking, this preparation was filtered through Miracloth and centrifuged at 18,000 g for  
399 30 min. The supernatant was incubated overnight at 4 °C with RFP-Trap\_MA or GFP-  
400 Trap\_MA (Chromotek) used for controls. The beads were collected, washed three times  
401 with ice-cold extraction buffer and once with 50 mM Tris-HCl pH 7.5. Proteins that were

402 retained on the beads were separated by SDS–PAGE 7% w/v and analyzed by western  
403 blot with anti-RFP or GFP monoclonal antibodies (Chromotek).

404

#### 405 **Small angle X-ray scattering (SAXS) of *Mma*-GluII and *Mma*-GluII<sub>Tryps</sub>**

406 SAXS data for *Mma*-GluII and *Mma*-GluII<sub>Tryps</sub> were collected at the BM29 beamline at  
407 the European Synchrotron Radiation Facility, Grenoble, France. The wavelength was set  
408 at 0.992 Å and transmission was at 100%, with images recorded on a Pilatus 1M detector  
409 set to a distance of 2.886 m. Calibration was conducted with measurements on albumin or  
410 glucose oxidase in order to derive molecular weights from  $I_0$  values. All measurements  
411 were carried out in 150 mM NaCl and 20 mM HEPES at pH 7.4. A twofold dilution  
412 series with six concentrations between 4.12 mg/ml and 0.13 mg/ml was measured for  
413 *Mma*-GluII<sub>Tryps</sub> and a twofold dilution series with five concentrations between 2.97  
414 mg/ml and 0.17mg/ml was measured for *Mm*  $\alpha$ -GluII. 30  $\mu$ l of each sample were flowed  
415 through a quartz capillary taking 10 x 1 s images. Automated image processing followed  
416 by buffer subtraction as part of the processing pipeline at the beamline allowed scattering  
417 curves to be used for further data processing. SAXS data were processed using the  
418 ATSAS (21) software suite. Using PRIMUS (22), for both *Mma*-GluII and *Mma*-  
419 GluII<sub>Tryps</sub> samples, the low-angle region of the low concentration scattering curves were  
420 merged with the high angle regions of the high-concentration profile. This was done to  
421 compensate for interparticle effects at high concentration. The radius of gyration was  
422 determined using PRIMUS (22), and  $D_{\max}$  was calculated from the pair distribution  
423 function calculated by GNOM (23). Ten bead models were created for each structure by  
424 DAMMIN (24) and then aligned and averaged using DAMAVER (25). DAMMIN was

425 then used to compare the averaged model against raw data using reduced  $\chi^2$  values. All  
426 models possess  $0.9 < \chi^2 < 1.1$  against raw data. The crystal structure of *Mma*-GluII<sub>Tryps</sub>  
427 crystal structure was initially fitted to the *Mma*-GluII<sub>Tryps</sub> SAXS envelope using  
428 SUPCOMB(26). Chimera (27) was used to convert the SAXS envelopes to maps  
429 (command MOLMAP, using a 2.5 nm filter) and superpose the *Mma*-GluII SAXS map to  
430 the *Mma*-GluII<sub>Tryps</sub> SAXS map and model.  
431

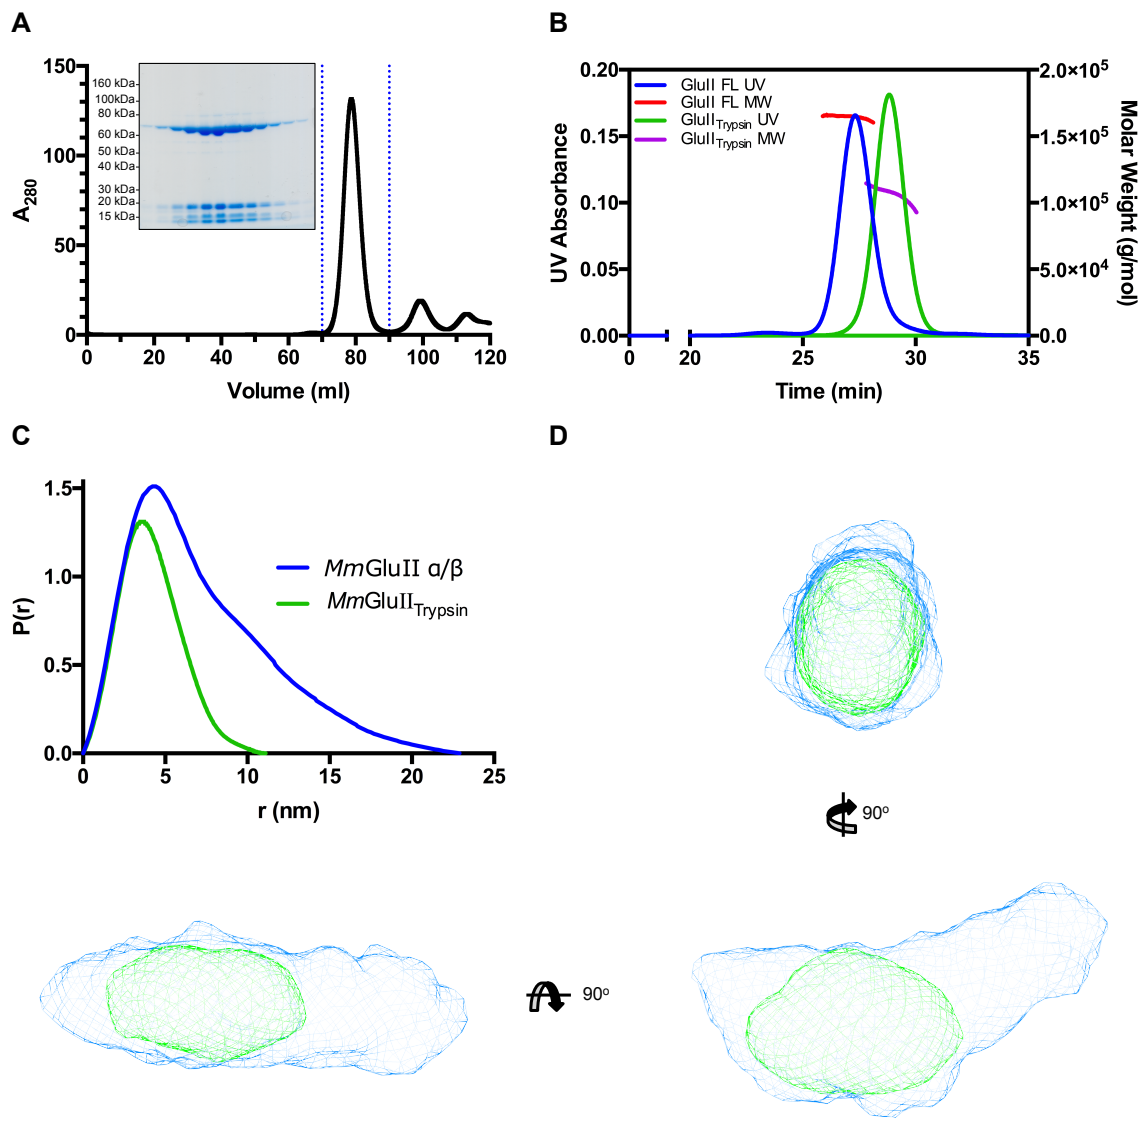

432

433 **Figure S1. Biochemical and structural characterization of the *Mma*-GluII<sub>Trypsin</sub>**

434 **fragment.** (A) Gel filtration purification of the *Mma*-GluII<sub>Trypsin</sub> fragment. Chromatogram

435 after 4 h incubation of *Mma*-GluII with trypsin on a Superdex 200 16/600 column. Inset:

436 SDS-PAGE analysis of the fractions indicated within the blue lines. (B) Size-exclusion

437 chromatography multi-angle laser light scattering (SEC-MALLS) of *Mma*-GluII. and

438 *Mma*-GluII<sub>Trypsin</sub>. Samples were separated on a Superdex 200 10/300 (GE Life sciences)

439 column pre-equilibrated in PBS. Samples were analyzed using a Prominence HPLC

440 (Shimadzu) at 0.5 ml/min with an online UV, refractive index and a Dawn HELEOS 8+

441 (Wyatt Technologies) multi-angle laser light scattering detector set to 662.3 nm. Peaks  
442 were analyzed with a Zimm model using a refractive index increment of 0.185 ml/g. (C)  
443 P(r) functions from analysis of SAXS data.  $D_{\max}$  was calculated from the pair distribution  
444 function calculated by GNOM (23). (D) Three orthogonal views of the SAXS hydrated  
445 envelopes for *Mm*  $\alpha$ -GluII<sub>Tryps</sub> (green mesh) and wt *Mm*  $\alpha$ -GluII (light blue mesh),  
446 overlaid in Chimera (27).  
447

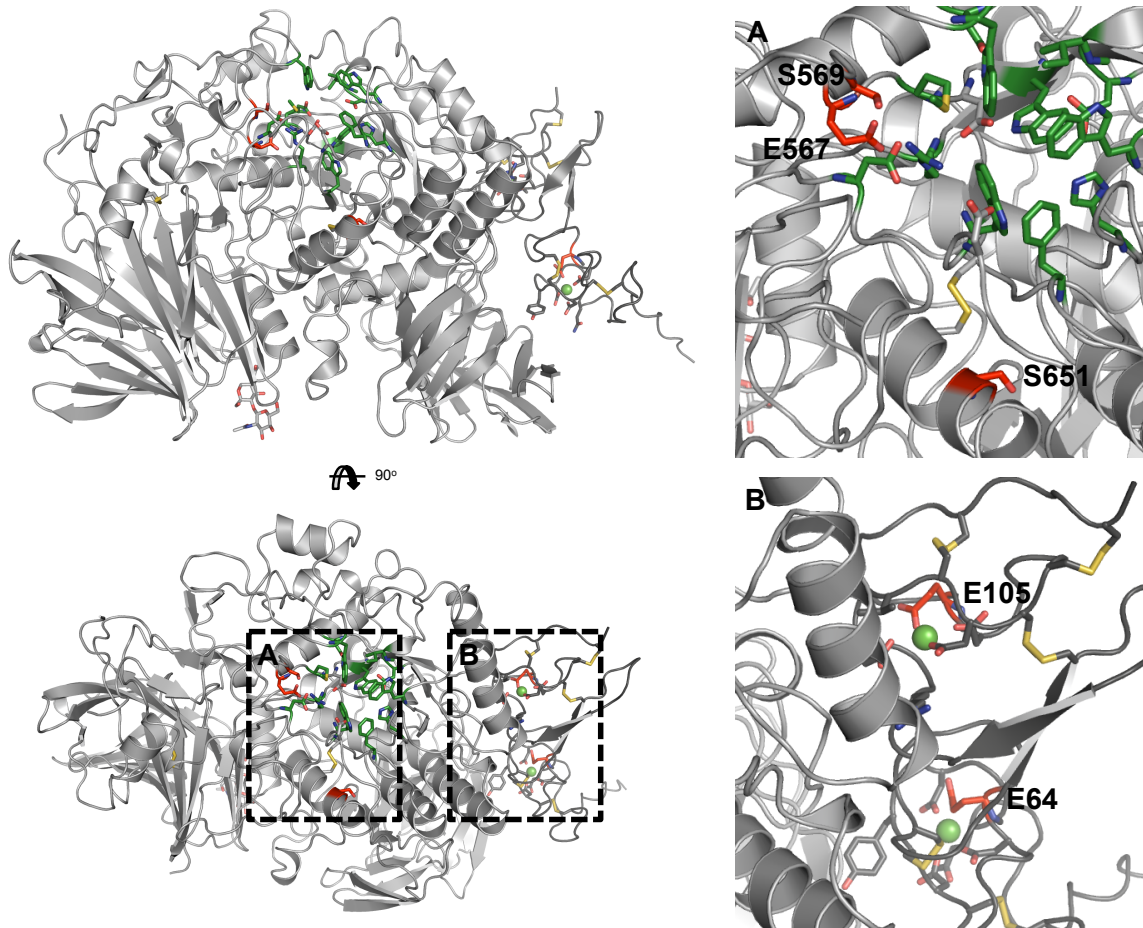

449

450 **Figure S2. Mapping of inactive mutants onto the *Mma*-GluII<sub>Tryps</sub> structure.** (A) The  
 451 *Mma*-GluII  $\alpha$ -subunit inactive E567Q mutant (28) and the *Arabidopsis thaliana* psl5-1  
 452 inactive mutant (*Ata*-GluII  $\alpha$ -subunit S517F) (29) corresponding to *Mma*-GluII  $\alpha$ -subunit  
 453 S569F, are in proximity of the active site (in green stick representation). The *Arabidopsis*  
 454 *thaliana* rsw3 inactive mutant (*Ata*-GluII  $\alpha$ -subunit S599F) corresponding to *Mma*-GluII  
 455  $\alpha$ -subunit S651F, destabilizes the core of the  $\alpha$ -subunit. (B) The *S. pombe*  $\alpha$ -GluII  $\beta$ -  
 456 subunit E73A and E114A inactive mutants (30), corresponding to *Mma*-GluII  $\beta$ -subunit  
 457 E64A and E105A, disrupt the fold on the  $\beta$ -subunit because these glutamic acid residues  
 458 are needed to coordinate the Ca<sup>2+</sup> ions in the LDLRa  $\beta$ -subunit subdomains.

459





461 **Figure S3. The calcium ions in the N-terminal LDLRa subdomains of the *Mma-***  
462 ***GluII*  $\beta$ -subunit. (A) First  $\text{Ca}^{2+}$  ion, (B) second  $\text{Ca}^{2+}$  ion. Distances from coordinating**  
463 atoms are indicated in Å. Blue: Carbon. Red: Oxygen. Green: Calcium. H atoms omitted.  
464 The dimensionless CBVS(31) values computed from the geometry of the octahedral  
465 coordination sphere were 2.38 and 2.41 for the first and the second calcium ion,  
466 respectively, and confirm their chemical identity:  $\text{CBVS} = S_j \exp((d_{\text{Ca}0} - d_{ij})/b) p_j$ , where  
467  $d_{\text{Ca}0}$  is the Calcium bond valence radius 1.967 Å,  $d_{ij}$  is measured from the model,  $b$  is a  
468 'universal constant' of 0.37 Å, and  $p_j$  is the occupancy of the ligand, which in this case is  
469 always 1.0. CBVS values for a few commonly occurring metal ions:  $\text{Ca}^{2+}$ : 2.0. Mg: 4.19.  
470  $\text{Fe}^{3+}$ : 5.26  $\text{Fe}^{2+}$ : 3.75;  $\text{Zn}^{2+}$ : 4.07;  $\text{Mn}^{2+}$ : 3.23 (from (31)). The structure explains the  
471 known *S. pombe*  $\beta$ -subunit mutants E73A and E114A, inactive against  $\text{Glc}_1\text{Man}_9(30)$ :  
472 both residues are part of a calcium ion coordination sphere in one of the  $\beta$ -subunit  
473 LDLRa subdomains ( $\beta$  E64 and E105 in *Mma*-*GluII*). (C) Sequence alignments of  
474 selected stretches of sequence in the  $\alpha$ -*Glu II*  $\beta$ -subunit in four eukaryotes: *Hs*: *Homo*  
475 *sapiens*; *Mm*: *Mus musculus*; *At*: *Arabidopsis thaliana*; *Sp*: *Schizosaccharomyces pombe*.  
476 Magenta squares indicate the  $\text{Ca}^{2+}$ -binding residues, respectively. Blue triangles show the  
477 residues involved in the interface with the  $\alpha$ -subunit.  
478

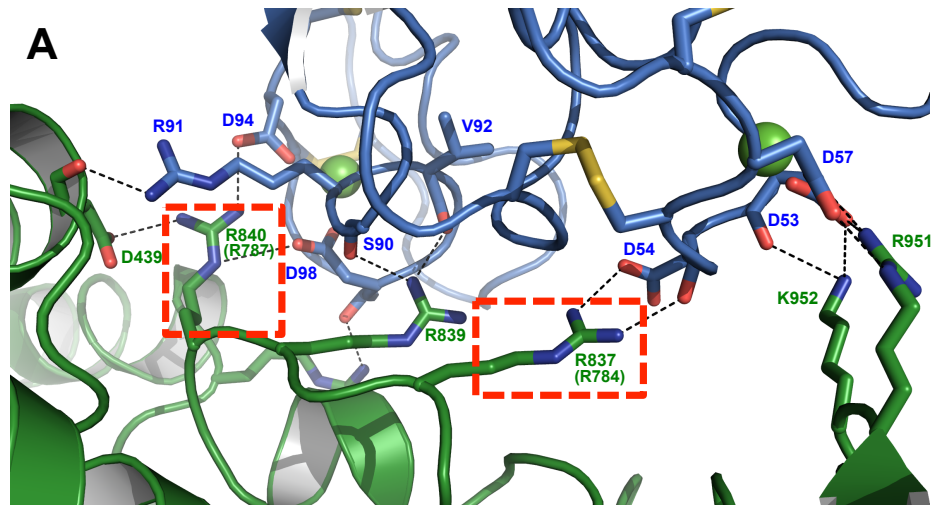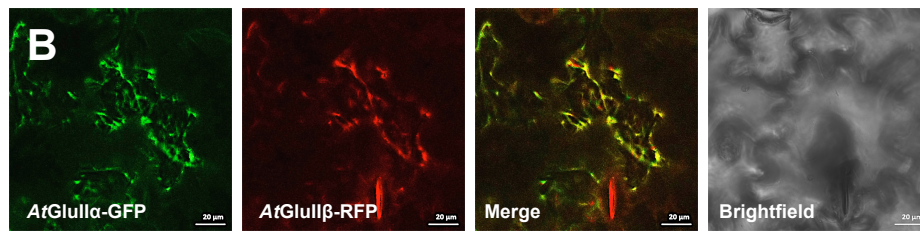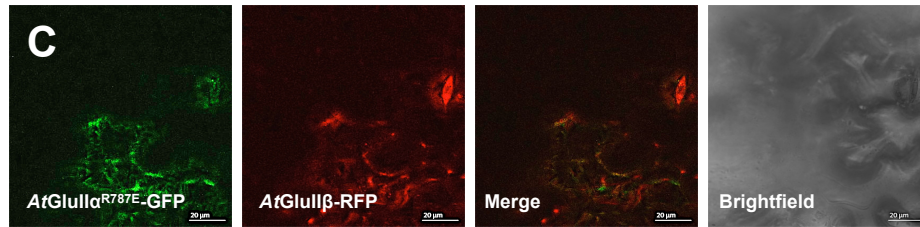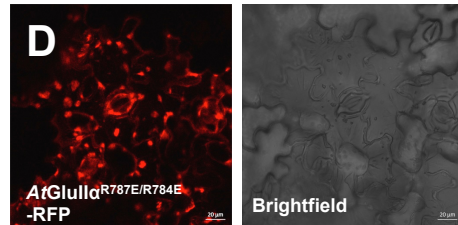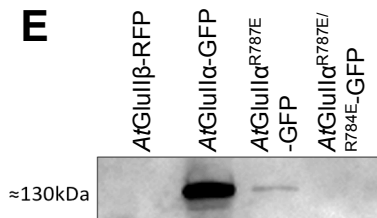

IP:  $\alpha$ GFP    IP:  $\alpha$ GFP  
WB:  $\alpha$ GFP    WB:  $\alpha$ GFP

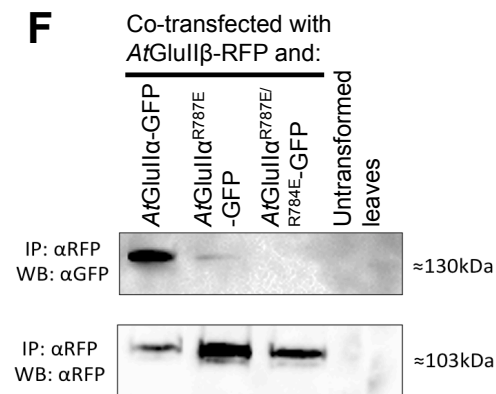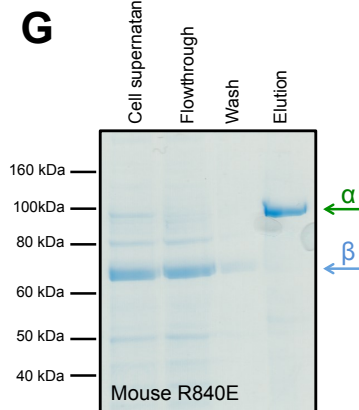

480 **Figure S4. The N-terminal domain of the  $\beta$ -subunit of  $\alpha$ -GluII mediates its contact**  
481 **to the  $\alpha$ -subunit.** (A) Details of the Mm $\alpha$ -GluII<sub>Tryps</sub>  $\alpha/\beta$  interface in the crystal. Carbon  
482 atoms in the  $\alpha$ - and  $\beta$ -subunits are green and blue, respectively. Red: oxygen; dark blue:  
483 nitrogen; yellow: sulfur. The two calcium ions in the  $\beta$ -subunit are depicted as green  
484 spheres. H atoms omitted. Highlighted in dashed red rectangles are the two conserved  
485 Arg residues that were mutated to validate the interface *in vitro* and *in planta* (the  
486 numbers in parentheses refer to the *Arabidopsis thaliana* sequence). (B,C,D) *AtGluII $\alpha$* -  
487 GFP, *AtGluII $\alpha$* <sup>R787E</sup>-GFP and *AtGluII $\alpha$* <sup>R784E-R787E</sup>-RFP fusion proteins. Confocal optical  
488 sections of *Nicotiana tabacum*. (B) Transient expression of *AtGluII $\alpha$* -GFP and *AtGluII $\beta$* -  
489 RFP. The two subunits co-localize in the ER. (C) Transient expression of *AtGluII $\alpha$* <sup>R787E</sup>-  
490 GFP and *AtGluII $\beta$* -RFP. The two subunits still co-localize in the ER. (D) Fluorescence  
491 microscopy of tobacco leaves transfected with the *At $\alpha$* -GluII  $\alpha$ -subunit double mutant  
492 R784E/R787E, initially fused with GFP, did not show any fluorescence. Since GFP  
493 fluorescence is reported to be quenched in acidic subcellular compartments (32), to test  
494 the hypothesis that the doubly mutated *At $\alpha$* -GluII  $\alpha$ -subunit loses ER localization and is  
495 routed to an acidic compartment, *e.g.* lytic vacuoles or autophagosomes, we fused the  
496 *At $\alpha$* -GluII  $\alpha$ -subunit R784E/R787E double mutant with RFP (whose fluorescence is pH-  
497 independent) instead. Transient expression of *AtGluII $\alpha$* <sup>R784E/R787E</sup>-RFP fusion protein  
498 gives fluorescence that doesn't highlight the ER network. It is localized in a different  
499 compartment, probably corresponding to autophagosomes or lytic vacuoles. Scale bar =  
500 20  $\mu$ m. (E) Immunoprecipitation using anti-GFP ( $\alpha$ -GFP) and western blotting of tobacco  
501 leaves extracts ( $\alpha$ -GFP). Leaves were transfected with *AtGluII $\beta$* -RFP, *AtGluII $\alpha$* -GFP,  
502 *AtGluII $\alpha$* -GFP single mutant R787E, *AtGluII $\alpha$* -GFP double mutant R784E/R787E and

503 detected with  $\alpha$ -GFP antibodies. (F) Co-immunoprecipitation using anti-RFP ( $\alpha$ -RFP)  
504 and western blotting of tobacco leaves extracts using  $\alpha$ -GFP and/or  $\alpha$ -RFP antibodies.  
505 Leaves were co-transfected with *AtGluII* $\beta$ -RFP and *AtGluII* $\alpha$ -GFP, *AtGluII* $\alpha$ -GFP single  
506 mutant R787E, *AtGluII* $\alpha$ -GFP double mutant R784E/R787E and detected with  $\alpha$ -GFP  
507 antibodies (top panel) or with  $\alpha$ -RFP antibodies (bottom panel). (G) SDS-PAGE analysis  
508 of the IMAC purification of *Mma* $\alpha$ -GluII point mutant R840E. The  $\beta$ -subunit cannot  
509 associate with the His-tagged mutant  $\alpha$ -subunit, and flows straight through the Nickel  
510 column.  
511

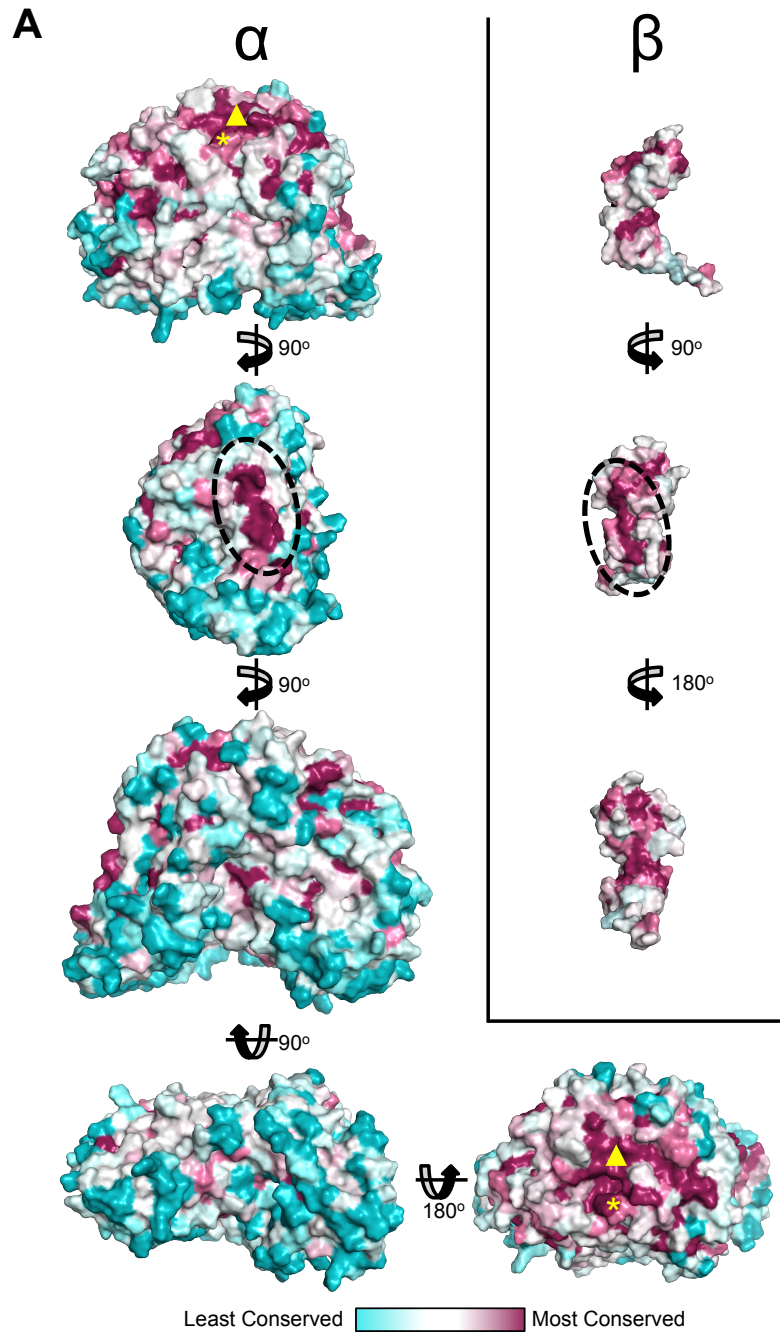

**B**

|                |     |   |   |   |   |   |   |   |   |   |   |   |   |   |   |   |   |   |   |   |   |   |
|----------------|-----|---|---|---|---|---|---|---|---|---|---|---|---|---|---|---|---|---|---|---|---|---|
| HsGANAB        | 556 | A | P | N | L | V | W | N | D | M | N | E | P | S | V | F | N | G | P | E | V | T |
| MmGANAB        | 556 | A | P | N | L | V | W | N | D | M | N | E | P | S | V | F | N | G | P | E | V | T |
| AtGANAB (ps15) | 504 | T | P | S | L | V | W | N | D | M | N | E | P | S | V | F | N | G | P | E | V | T |
| SpGANAB (g1s2) | 516 | D | K | N | L | V | W | N | D | M | N | E | P | S | V | F | N | G | P | E | V | T |
|                |     |   |   |   |   |   |   |   |   |   |   |   |   |   |   |   |   |   |   |   |   |   |
| HsGANAB        | 620 | S | R | F | G | A | W | G | D | N | T | A | E | W | H | L | K | S | I |   |   |   |
| MmGANAB        | 630 | S | R | F | G | A | W | G | D | N | T | A | E | W | H | L | K | S | I |   |   |   |
| AtGANAB (ps15) | 578 | T | R | Y | G | A | W | G | D | N | T | A | E | W | H | L | R | V | S | I |   |   |
| SpGANAB (g1s2) | 590 | T | S | A | L | A | N | W | G | D | T | M | T | W | H | L | R | G | S | I |   |   |
|                |     |   |   |   |   |   |   |   |   |   |   |   |   |   |   |   |   |   |   |   |   |   |
| HsGANAB        | 830 | R | L | V | P | R | W | M | R | R | R | S | S | E | C | M |   |   |   |   |   |   |
| MmGANAB        | 830 | R | L | V | P | R | W | M | R | R | R | S | S | S | C | M |   |   |   |   |   |   |
| AtGANAB (ps15) | 777 | R | L | V | P | R | K | D | R | R | R | S | S | S | C | M |   |   |   |   |   |   |
| SpGANAB (g1s2) | 790 | R | L | V | L | T | R | R | R | R | A | A | E | L | L |   |   |   |   |   |   |   |
|                |     |   |   |   |   |   |   |   |   |   |   |   |   |   |   |   |   |   |   |   |   |   |

**C**

|          |      |   |   |   |   |   |   |   |   |   |   |   |   |   |   |   |   |   |   |   |   |   |
|----------|------|---|---|---|---|---|---|---|---|---|---|---|---|---|---|---|---|---|---|---|---|---|
| MmGANAB  | 302  | Y | N | D | V | E | Q | Y | E | L | N |   |   |   |   |   |   |   |   |   |   |   |
| HsCtMGAM | 1154 | F | S | R | D | . | . | P | P | G | Y |   |   |   |   |   |   |   |   |   |   |   |
| HsCtSI   | 1134 | F | T | R | D | . | . | P | P | G | Y |   |   |   |   |   |   |   |   |   |   |   |
| HsNtMGAM | 286  | F | N | R | D | . | . | T | T | N | G |   |   |   |   |   |   |   |   |   |   |   |
| HsNtSI   | 261  | F | T | R | D | . | . | L | E | G | D |   |   |   |   |   |   |   |   |   |   |   |
|          |      |   |   |   |   |   |   |   |   |   |   |   |   |   |   |   |   |   |   |   |   |   |
| MmGANAB  | 556  | A | P | N | L | V | W | N | D | M | N | E | P | S | V | F | N | G | P | E | V | T |
| HsCtMGAM | 1412 | H | K | F | D | G | W | F | D | M | N | E | P | S | V | F | N | G | P | E | V | T |
| HsCtSI   | 1386 | W | K | F | D | G | W | F | D | M | N | E | P | S | V | F | N | G | P | E | V | T |
| HsNtMGAM | 521  | V | E | F | D | G | W | F | D | M | N | E | P | S | V | F | N | G | P | E | V | T |
| HsNtSI   | 497  | V | O | Y | D | G | W | F | D | M | N | E | P | S | V | F | N | G | P | E | V | T |
|          |      |   |   |   |   |   |   |   |   |   |   |   |   |   |   |   |   |   |   |   |   |   |
| MmGANAB  | 630  | S | R | F | G | A | W | G | D | N | T | A | E | W | H | L | K | S | I |   |   |   |
| HsCtMGAM | 1516 | S | G | R | W | A | C | H | W | G | D | N | T | A | E | W | D | L | K | K | S | I |
| HsCtSI   | 1490 | S | G | R | W | G | G | H | W | G | D | N | T | A | E | W | D | L | K | K | S | I |
| HsNtMGAM | 618  | S | K | F | A | A | H | W | G | D | N | T | A | E | W | D | L | R | W | S | I |   |
| HsNtSI   | 594  | S | G | R | H | A | A | H | W | G | D | N | T | A | E | W | D | L | R | W | S | I |
|          |      |   |   |   |   |   |   |   |   |   |   |   |   |   |   |   |   |   |   |   |   |   |

513 **Figure S5. (A)** Sequence conservation painted on the surface of the *Mm* $\alpha$ -GluII<sub>Tryps</sub>  
514 crystal structure. The dashed line marks the footprint of each subunit onto the other. A  
515 yellow asterisk marks the location of the conserved exclusion loop. Residue F307 is part  
516 of a conserved ring of aromatic residues (marked by a yellow triangle) between the  $\alpha$ -Glu  
517 II +1 and +2 subsites, comprising F307, W423, F674 and H700. The figure was obtained  
518 by plotting conservation across an alignment of 29 eukaryotic  $\alpha$ -GluII sequences using  
519 the program Consurf (33). **(B)** Sequence alignments of selected stretches of sequence in  
520 the  $\alpha$ -Glu II  $\alpha$ -subunit in four eukaryotes: *Hs*: *Homo sapiens*; *Mm*: *Mus musculus*; *At*:  
521 *Arabidopsis thaliana*; *Sp*: *Schizosaccharomyces pombe*. Magenta and orange squares  
522 indicate the nucleophilic and acid/base catalytic Asp residues, respectively. Green  
523 triangles show the conserved Arg residues in the interface with the  $\beta$ -subunit. **(C)**  
524 Sequence alignments of selected stretches of sequence in the  $\alpha$ -Glu II  $\alpha$ -subunit with the  
525 corresponding ones in human intestinal  $\alpha$ -glucosidases. Ct(Nt)MGAM: C-terminal (N-  
526 terminal) domain of maltase-glucoamylase; Ct(Nt) SI: C-terminal (N-terminal) domain of  
527 sucrase-isomaltase. Blue boxes: exclusion loop insertion. Magenta and orange squares:  
528 see **(B)** All alignments were produced in ESPript using the server at ESPript -  
529 <http://esprict.ibcp.fr> (34).  
530



536 residues  $\alpha$  951-952 and  $\beta$  50-61, which were protected from deuterium uptake for up to  
537 60 minutes (Figs 5A,B), consistent with the  $\alpha/\beta$  interface in the crystals. **(A,B)** Heat maps  
538 of full-length wt *Mma*-GluII  $\alpha$ - and  $\beta$ -subunits, with the extent of H/D exchange from 10  
539 seconds to 60 minute time points. The  $\alpha$ -subunit N-terminal (purple), GH31 (green)  
540 +insert (yellow) and C-terminal proximal (orange) and distal (red) domains are  
541 highlighted. The  $\beta$ -subunit LDLRa subdomains present in the crystal structure of *Mma*-  
542 GluII<sub>Tryps</sub> are highlighted in blue. **(C)** Surface representation of *Mma*-GluII<sub>Tryps</sub> coloured  
543 by rate of Hydrogen-Deuterium Exchange obtained from the wt *Mma*-GluII. From red  
544 (high exchange) to blue (no exchange) through orange, yellow and green: white: no data  
545 available. The catalytic residues D564 and D640 are in red sticks. The Calcium ions in  
546 the  $\beta$ -subunit are green spheres. The  $\alpha/\beta$  interface residues  $\alpha$  -951-952 and  $\beta$  -50-61,  
547 protected from H/D exchange, are boxed by a dashed red line and marked by white “+”  
548 signs. The helices  $\alpha$  427-441 and  $\alpha$  470-482, protected by the  $\beta$ -subunit in the context of  
549 the wt heterodimer are marked by a white asterisk.  
550



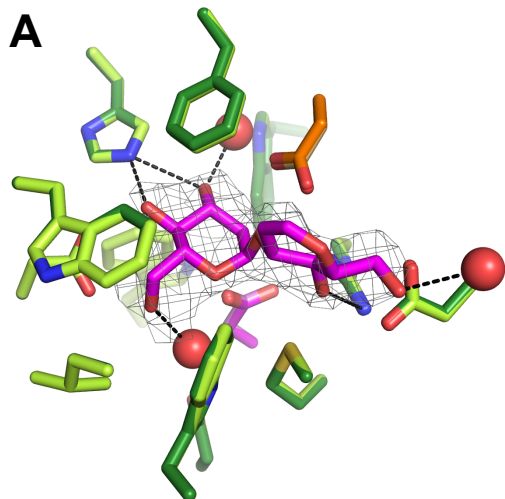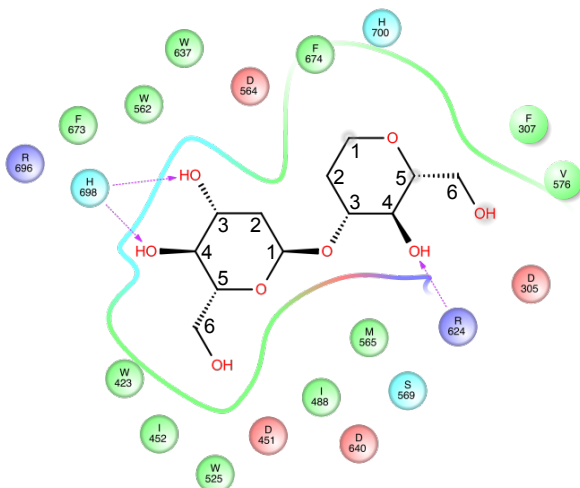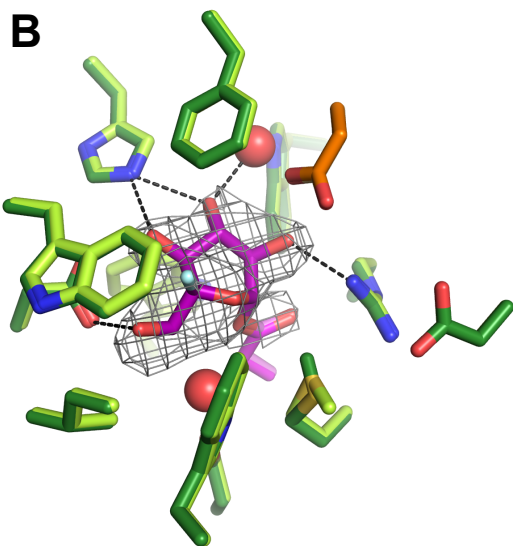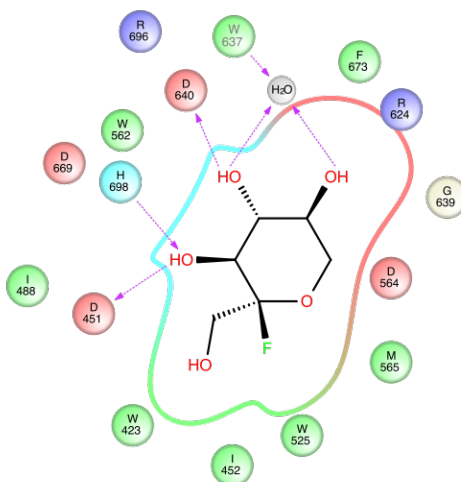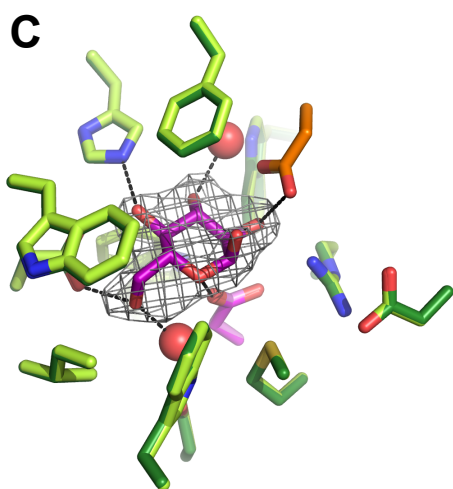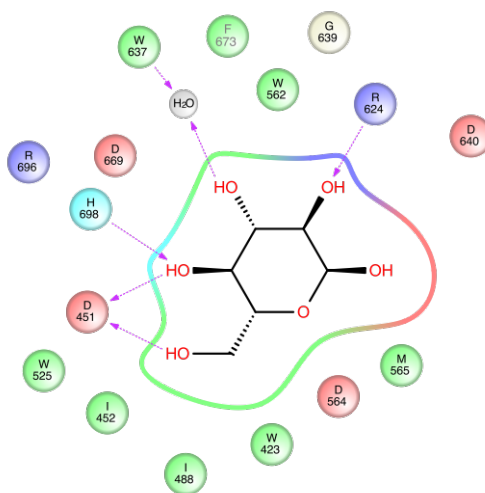

552 **Figure S7. Interactions of *Mma*-GluII<sub>Tryps</sub> with its catalytic cycle ligands.** The *Mma*-  
553 GluII<sub>Tryps</sub> active site in crystals soaked with catalytic cycle ligands is represented with C-  
554 atoms in dark green, and overlaid onto the apo structure with C-atoms in light green.  
555 Unbiased F<sub>o</sub>-F<sub>c</sub> residual electron density maps are contoured at 3.0  $\sigma$ . **(A)** D-Glucal  
556 transglucosylation product, substrate analogue. **(B)** Adduct with 5-fluoro-D-glucose,  
557 reaction intermediate analogue. **(C)** D-glucose, product. 2-Dimensional ligand plots made  
558 with Maestro (35).  
559

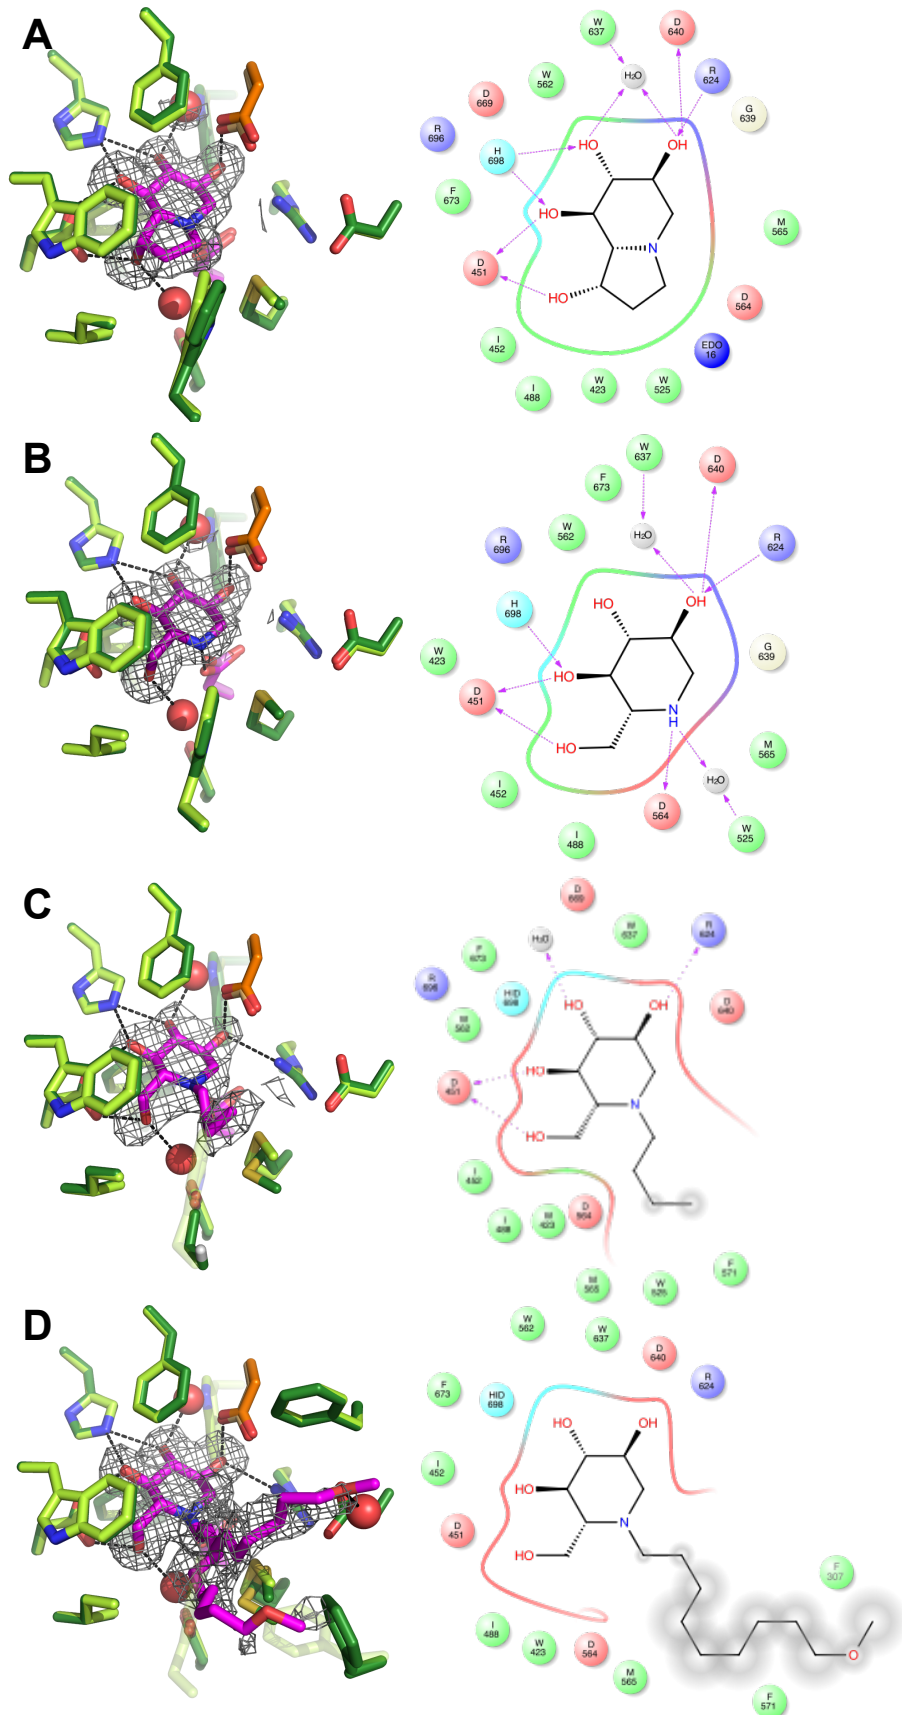

561 **Figure S8. Interactions of *Mma*-GluII<sub>Tryps</sub> with its iminosugar inhibitors.** The *Mm*  $\alpha$  -  
562 GluII<sub>Tryps</sub> active site in crystals soaked with inhibitors is represented with C-atoms in dark  
563 green, and overlaid onto the apo structure with C-atoms in light green. Unbiased  $F_o-F_c$   
564 residual electron density maps are contoured at  $3.0 \sigma$ . **(A)** Castanospermine. **(B)** DNJ. **(C)**  
565 NB-DNJ. The W525 apo structure side chain displaced by the inhibitor is in semi-  
566 transparent shaded representation **(D)** MON-DNJ. The apo structure loop displaced by  
567 the inhibitor is in semi-transparent shaded representation. 2-Dimensional ligand plots  
568 made with Maestro(35).  
569

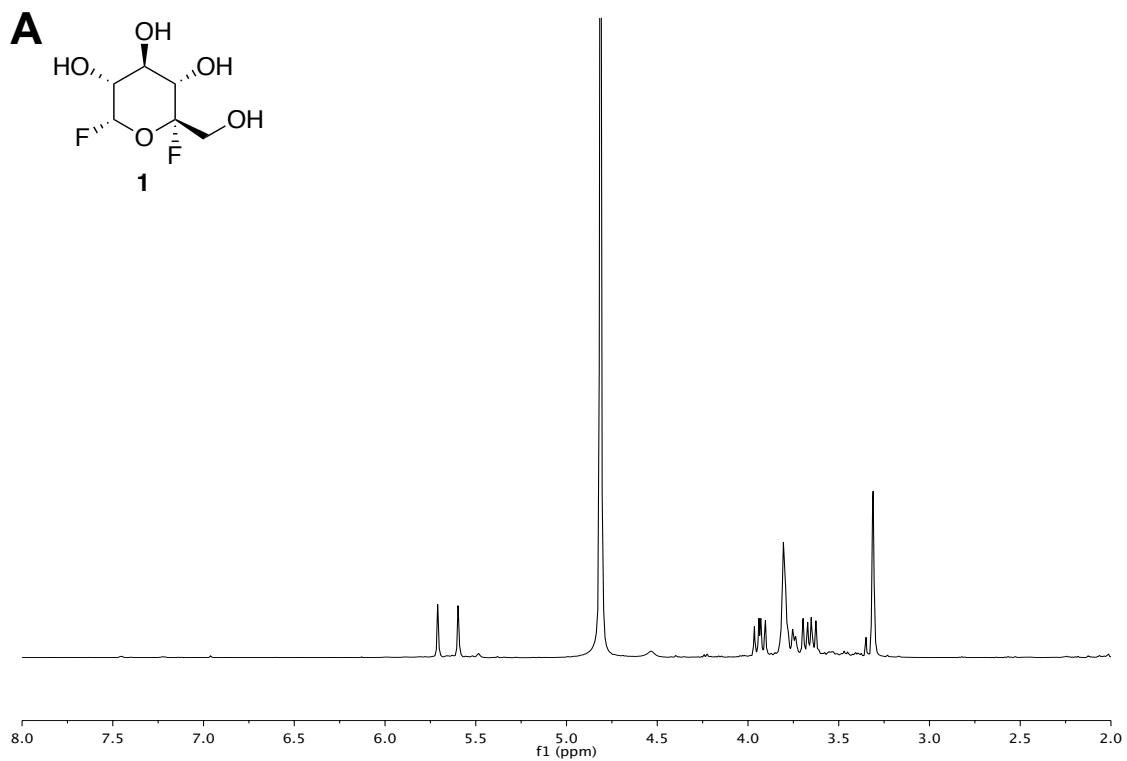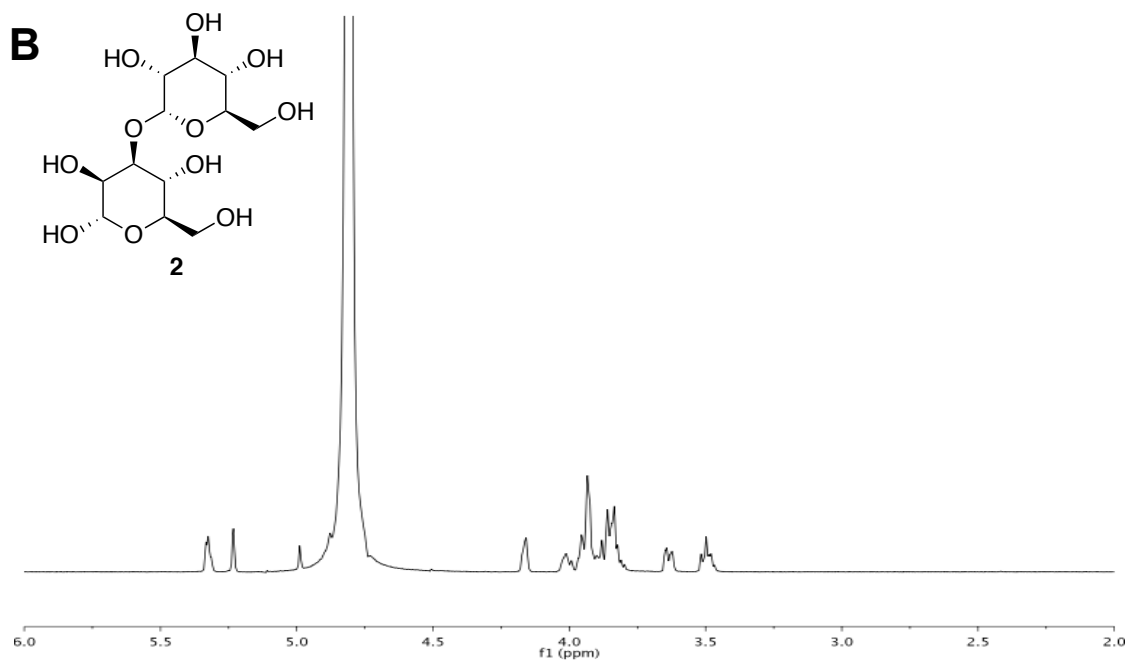

570  
 571 **Figure S9. NMR spectra of 1.** (A)  $^1\text{H}$  NMR spectrum of **1** (500 MHz,  $\text{CD}_3\text{OD}$ ). (b)  $^{13}\text{C}$   
 572 NMR spectrum of **1** (125 MHz,  $\text{CD}_3\text{OD}$ ). (B)  $^1\text{H}$  NMR spectrum of **2** (500 MHz,  
 573  $\text{CD}_3\text{OD}$ )

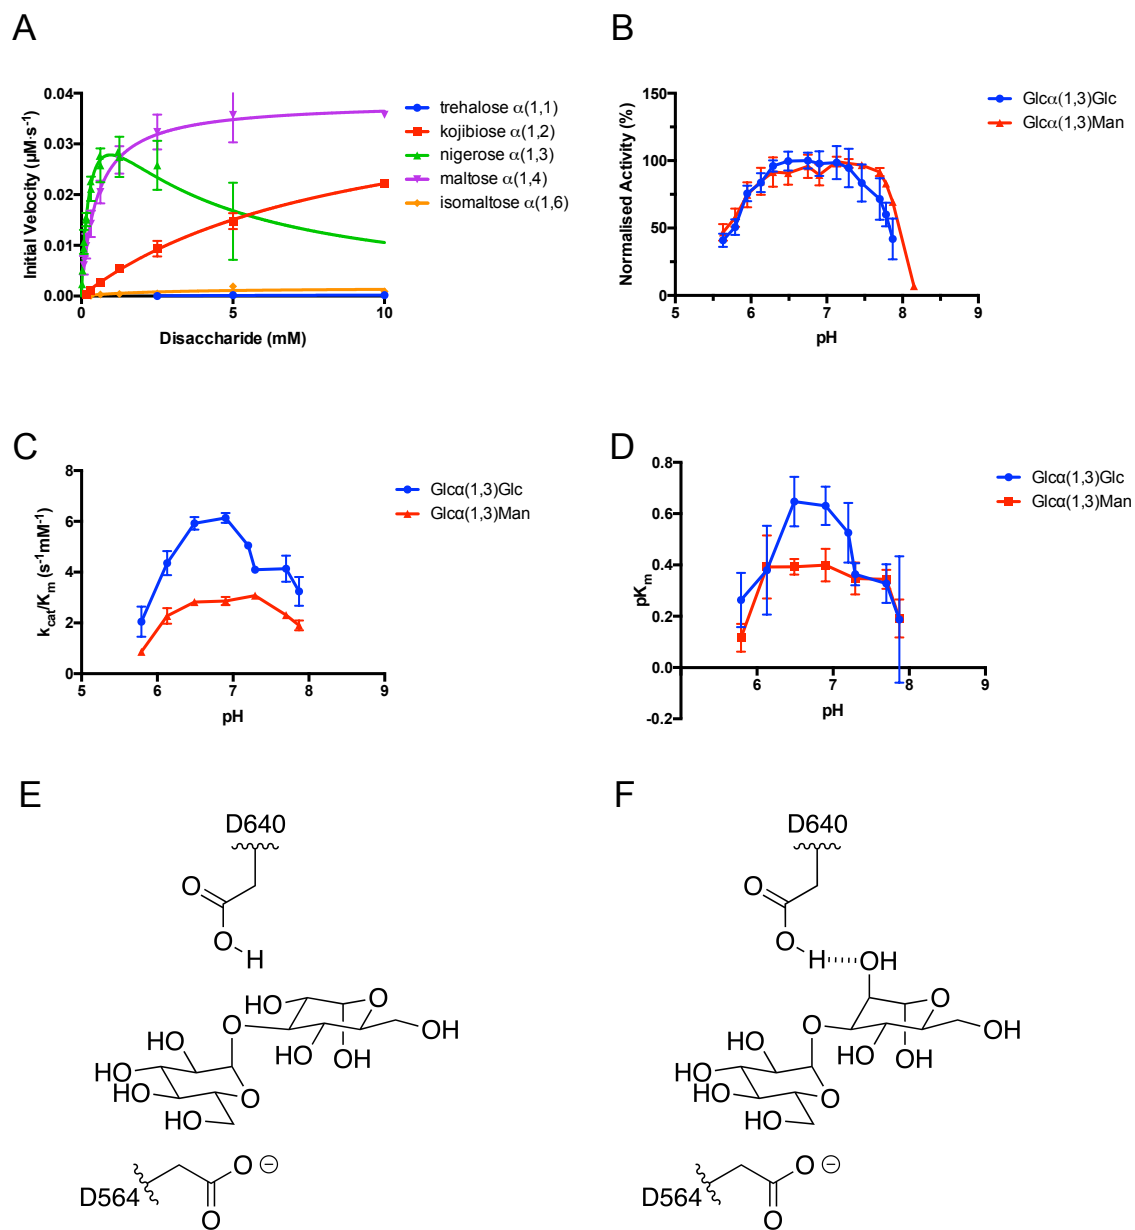

574

575 **Figure S10.  $\alpha$ -GluII-mediated hydrolysis of disaccharides.** (A) *Mma*-GluII activity  
 576 against a number of diglucosides. Michaelis-Menten curves for the different diglucosides  
 577 derived by non-linear regression analysis. The nigerose points are fitted to a substrate  
 578 inhibition model. (B) Normalized activity of Glc- $\alpha(1,3)$ -Glc and Glc- $\alpha(1,3)$ -Man  
 579 substrates over a range of pHs at 1mM substrate. (C) Plot of the specificity constant  
 580  $k_{\text{cat}}/K_m$  over the same pH range as (B). (D) Plot of  $\text{p}K_m$  over the same pH range as (B).

581 Error bars are standard deviations from up to four separate experiments all conducted in  
582 triplicate. **(E)** Schematic of Glc- $\alpha$ (1,3)-Glc binding between the two catalytic active site  
583 residues. **(F)** Schematic of Glc- $\alpha$ (1,3)-Man binding between the two catalytic active site  
584 residues, highlighting the proposed hydrogen bond donated by the general acid/base  
585 D640 to the C-2 hydroxyl of the mannose ring at subsite +1.  
586

587 **Supplementary Tables.**

588 **Table S1. SAXS analysis of *Mma-GluII* and *Mma-GluII*<sub>Tryps</sub>**

589

|                                                         | <i>Mma-GluII</i> | <i>Mma-GluII</i> <sub>Tryps</sub> |
|---------------------------------------------------------|------------------|-----------------------------------|
| <b><i>q</i> range, (nm<sup>-1</sup>)</b>                | 0.01-0.5         | 0.01-0.5                          |
| <b>Exposure time (s)</b>                                | 10               | 10                                |
| <b>Temperature (K)</b>                                  | 293              | 293                               |
| <b>Concentration Range, (mg ml<sup>-1</sup>)</b>        | 0.17-2.97        | 0.13-4.12                         |
|                                                         |                  |                                   |
| <b>Structural Parameters</b>                            |                  |                                   |
|                                                         |                  |                                   |
| <b>I<sub>(0)</sub> (cm<sup>-1</sup>) [From P(r)]</b>    | 159.10±0.59      | 74.80±0.16                        |
| <b>R<sub>g</sub> (nm) [from P(r)]</b>                   | 5.85±0.03        | 3.20±0.02                         |
| <b>I<sub>(0)</sub> (cm<sup>-1</sup>) [From Guinier]</b> | 157.84±0.89      | 74.70±0.12                        |
| <b>R<sub>g</sub> (nm) [from Guinier]</b>                | 5.56±0.05        | 3.18±0.02                         |
| <b>D<sub>max</sub> (Å)</b>                              | 229              | 111                               |
| <b>Porod Volume (nm<sup>3</sup>)</b>                    | 293.83           | 166.68                            |

590

591



592  
593

**Table S2. *Mma*-GluII<sub>Tryps</sub> crystals. X-ray data collection and refinement statistics.**

| Structure, PDB ID                                   | Apo, 5F0E                           | Glucal, 5HJO                                      | 5-Fl Glc fluoride, 5HJR    | Glucose, 5H9O                                     |
|-----------------------------------------------------|-------------------------------------|---------------------------------------------------|----------------------------|---------------------------------------------------|
| <b>Data collection</b>                              |                                     |                                                   |                            |                                                   |
| Space group, Z                                      | P2 <sub>1</sub> 2 <sub>1</sub> 2, 4 | P2 <sub>1</sub> 2 <sub>1</sub> 2 <sub>1</sub> , 8 | P2 <sub>1</sub> , 4        | P2 <sub>1</sub> 2 <sub>1</sub> 2 <sub>1</sub> , 8 |
| Cell dimensions                                     |                                     |                                                   |                            |                                                   |
| <i>a, b, c</i> (Å)                                  | 104.14, 173.77, 62.8                | 103.48, 176.44, 127.0                             | 103.51, 174.67, 63.7       | 102.14, 170.74, 125.9                             |
| $\alpha, \beta, \gamma$ (°)                         | 90.0, 90.0, 90.0                    | 90.0, 90.0, 90.0                                  | 90.0, 91.31, 90.0          | 90.0, 90.0, 90.0                                  |
| Resolution (Å)                                      | 59.09-1.74<br>(1.83-1.74)*          | 176.44-2.29<br>(2.41-2.29)                        | 174.66-2.40<br>(2.53-2.40) | 87.66-2.37<br>(2.43-2.37)                         |
| <i>R</i> <sub>sym</sub>                             | 0.08 (0.64)                         | 0.21 (1.57)                                       | 0.24 (2.46)                | 0.24 (1.53)                                       |
| <i>I</i> / <i>sI</i>                                | 12.9 (2.4)                          | 8.7 (1.1)                                         | 7.6 (1.2)                  | 5.1 (1.2)                                         |
| CC <sub>1/2</sub>                                   | 0.998 (0.802)                       | 0.996 (0.562)                                     | 0.993 (0.376)              | 0.975 (0.558)                                     |
| Completeness (%)                                    | 94.7 (96.0)                         | 96.9 (80.4)                                       | 99.3 (98.8)                | 99.7 (99.8)                                       |
| Redundancy                                          | 3.9 (3.9)                           | 6.5 (5.0)                                         | 6.9 (7.0)                  | 5.5 (5.4)                                         |
| <b>Refinement</b>                                   |                                     |                                                   |                            |                                                   |
| Resolution (Å)                                      | 59.05-1.74                          | 103.10-2.29                                       | 103.48-2.40                | 87.66-2.37                                        |
| No. reflections                                     | 109901                              | 101524                                            | 87211                      | 89373                                             |
| <i>R</i> <sub>work</sub> / <i>R</i> <sub>free</sub> | 0.142/0.169                         | 0.209/0.235                                       | 0.178/0.202                | 0.222/0.251                                       |
| No. atoms                                           |                                     |                                                   |                            |                                                   |
| Protein                                             | 8722                                | 15035                                             | 15213                      | 15268                                             |
| Ligand/ion                                          | 309                                 | 420                                               | 175                        | 381                                               |
| Water                                               | 922                                 | 449                                               | 424                        | 439                                               |
| <i>B</i> -factors (Å <sup>2</sup> )                 |                                     |                                                   |                            |                                                   |
| Protein                                             | 24.4                                | 47.0                                              | 65.7                       | 33.7                                              |
| Ligand/ion                                          | 45.0                                | 51.8                                              | 82.0                       | 68.5                                              |
| Water                                               | 35.3                                | 42.3                                              | 48.7                       | 25.8                                              |
| R.m.s. deviations                                   |                                     |                                                   |                            |                                                   |
| Bond lengths (Å)                                    |                                     |                                                   |                            |                                                   |
| Bond                                                | 0.01                                | 0.01                                              | 0.01                       | 0.01                                              |
| Bond angles (°)                                     |                                     |                                                   |                            |                                                   |
| Bond                                                | 1.07                                | 1.10                                              | 1.13                       | 1.09                                              |
| Ramachandran Plot (%)                               |                                     |                                                   |                            |                                                   |
| Favoured                                            | 97.8                                | 97.7                                              | 97.8                       | 97.7                                              |
| Allowed                                             | 2.2                                 | 2.3                                               | 2.2                        | 2.3                                               |
| Forbidden                                           | 0                                   | 0                                                 | 0                          | 0                                                 |

594  
595  
596

Each structure was determined with X-ray diffraction data coming from one crystal only.  
Values in parentheses indicate data in the highest resolution shell.

597 **Table S3. Summary of activity and relative stability of *Mma*-GluII, *Mma*-GluII<sub>Tryps</sub>**  
 598 **and the *Mma*-GluII point mutants against different substrates. S.E.M.: standard error**  
 599 **of the mean.**

|                                        | 4-MUG                    |                                     |                        | Glc2<br>Man7<br>GlcNac2<br>-2AA | GlcMan7<br>GlcNac2<br>-2AA | T <sub>m</sub> (°C) (±<br>S.E.M) |
|----------------------------------------|--------------------------|-------------------------------------|------------------------|---------------------------------|----------------------------|----------------------------------|
|                                        | Activity<br>(% of<br>wt) | k <sub>cat</sub> (s <sup>-1</sup> ) | K <sub>m</sub><br>(μM) |                                 |                            |                                  |
| <b>Mm α-GluII</b>                      | YES                      | 66.1 ±<br>3.8                       | 10.0 ±<br>0.7          | YES                             | YES                        | 50.0 ± 0.5                       |
| <b>Mm α-<br/>GluII<sub>Tryps</sub></b> | 70%                      | 46.2 ±<br>5.0                       | 10.5 ±<br>0.8          | YES                             | YES                        | 48.5 ± 0.1                       |
| <b>D564N</b>                           | NO                       | Not<br>tested                       | Not<br>tested          | NO                              | NO                         | 54.3 ± 0.1                       |
| <b>D564E</b>                           | NO                       | Not<br>tested                       | Not<br>tested          | NO                              | NO                         | 48.3 ± 0.1                       |
| <b>D640N</b>                           | NO                       | Not<br>tested                       | Not<br>tested          | NO                              | NO                         | 43.7 ± 0.2                       |
| <b>F307G-<br/>ΔQ308</b>                | 17%                      | Not<br>tested                       | Not<br>tested          | Not tested                      | Not tested                 | 46.3 ± 0.1                       |
| <b>Δ307-308</b>                        | NO                       | Not<br>tested                       | Not<br>tested          | Not tested                      | Not tested                 | 46.8 ± 0.2                       |
| <b>R840E</b>                           | 10%                      | 10.5±0.2                            | 12.9±<br>1.0           | Not tested                      | Not tested                 | 43.3 ± 0.5                       |

600  
601

602 **Table S4. Kinetic parameters of diglucoside cleavage by *Mma*-GluII.** Errors are the  
 603 95% confidence intervals§ based on five separate experiments.

| <b>Diglucoside,<br/>glycosidic bond</b> | <b>V<sub>max</sub> (nM/s)</b> | <b>k<sub>cat</sub> (1/s)</b> | <b>K<sub>m</sub> (mM )</b> | <b>k<sub>cat</sub>/K<sub>m</sub><br/>(1/sM)</b> | <b>Goodness-of-fit,<br/>R<sup>2</sup></b> |
|-----------------------------------------|-------------------------------|------------------------------|----------------------------|-------------------------------------------------|-------------------------------------------|
| <b>Trehalose, α(1,1)</b>                | 0.57                          | 0.02 ± 0.06                  | 19.09 ± 79.9               | 0.00                                            | 0.68                                      |
| <b>Kojibiose, α(1,2)</b>                | 42.09                         | 1.40 ± 0.07                  | 8.98 ± 0.37                | 0.16                                            | 0.99                                      |
| <b>Nigerose, α(1,3)</b>                 | 45.14                         | 1.50 ± 0.07                  | 0.30 ± 0.08                | 5.05                                            | 0.99                                      |
| <b>Maltose, α(1,4)</b>                  | 38.3                          | 1.28 ± 0.02                  | 0.50 ± 0.03                | 2.54                                            | 0.99                                      |
| <b>Isomaltose, α(1,6)</b>               | 1.67                          | 0.06 ± 0.03                  | 2.58 ± 3.65                | 0.02                                            | 0.56                                      |

604  
 605

606  
607  
608  
609

**Table S5. *Mma*-GluII<sub>Tryps</sub>:iminosugar crystals. X-ray data collection and refinement statistics.**

| Structure,<br>PDB ID                                | Castanospermine,<br>5IED            | DNJ, 5IEE                          | NB-DNJ, 5IEF                        | MON-DNJ, 5IEG                       |
|-----------------------------------------------------|-------------------------------------|------------------------------------|-------------------------------------|-------------------------------------|
| <b>Data collection</b>                              |                                     |                                    |                                     |                                     |
| Space group, Z                                      | P2 <sub>1</sub> 2 <sub>1</sub> 2, 4 | P2 <sub>1</sub> 2 <sub>1</sub> 2,4 | P2 <sub>1</sub> 2 <sub>1</sub> 2, 4 | P2 <sub>1</sub> 2 <sub>1</sub> 2, 4 |
| Cell dimensions                                     |                                     |                                    |                                     |                                     |
| <i>a</i> , <i>b</i> , <i>c</i> (Å)                  | 103.4,173.9,63.0                    | 103.48,173.71,62.91                | 103.84,172.89,62.77                 | 104.32,173.31,63.03                 |
| $\alpha$ , $\beta$ , $\gamma$ (°)                   | 90.0, 90.0, 90.0                    | 90.0, 90.0, 90.0                   | 90.0, 90.0, 90.0                    | 90.0, 90.0, 90.0                    |
| Resolution (Å)                                      | 173.9-1.81<br>(1.91-1.81)*          | 88.9-1.92<br>(2.02-1.92)           | 103.84-2.38<br>(2.51-2.38)          | 104.32-1.82<br>(1.83-1.82)          |
| <i>R</i> <sub>sym</sub>                             | 0.187 (1.726)                       | 0.238 (1.605)                      | 0.388 (1.957)                       | 0.127(0.987)                        |
| <i>I</i> / $\sigma$ <i>I</i>                        | 8.8 (1.2)                           | 7.2 (1.2)                          | 5.6 (0.9)                           | 12.1 (2.1)                          |
| CC <sub>1/2</sub>                                   | 0.996 (0.476)                       | 0.992 (0.412)                      | 0.960 (0.396)                       | 0.998(0.711)                        |
| Completeness (%)                                    | 100.0 (100.0)                       | 100.0 (100.0)                      | 95.9 (99.8)                         | 100.0 (97.5)                        |
| Redundancy                                          | 6.7 (6.6)                           | 6.6 (6.1)                          | 4.9 (5.0)                           | 6.7 (6.9)                           |
| <b>Refinement</b>                                   |                                     |                                    |                                     |                                     |
| Resolution (Å)                                      | 86.95-1.81                          | 88.90-1.92                         | 53.72-2.38                          | 89.38-1.82                          |
| No. reflections                                     | 103735                              | 87327                              | 44118                               | 102823                              |
| <i>R</i> <sub>work</sub> / <i>R</i> <sub>free</sub> | 0.160/0.184                         | 0.166/0.196                        | 0.188/0.218                         | 0.176/0.195                         |
| No. atoms                                           |                                     |                                    |                                     |                                     |
| Protein                                             | 7580                                | 7577                               | 7627                                | 7562                                |
| Ligand/ion                                          | 213                                 | 196                                | 152                                 | 163                                 |
| Water                                               | 884                                 | 950                                | 290                                 | 490                                 |
| <i>B</i> -factors (Å <sup>2</sup> )                 |                                     |                                    |                                     |                                     |
| Protein                                             | 32.3                                | 31.1                               | 34.3                                | 28.4                                |
| Ligand/ion                                          | 17.9                                | 19.1                               | 39.8                                | 25.6                                |
| Water                                               | 43.1                                | 41.6                               | 63.3                                | 28.7                                |
| R.m.s. deviations                                   |                                     |                                    |                                     |                                     |
| Bond lengths (Å)                                    | 0.01                                | 0.01                               | 0.01                                | 0.01                                |
| Bond angles (°)                                     | 1.06                                | 1.07                               | 1.13                                | 1.01                                |
| Ramachandran Plot (%)                               |                                     |                                    |                                     |                                     |
| Favoured                                            | 97.2                                | 97.2                               | 96.8                                | 96.9                                |
| Allowed                                             | 2.7                                 | 2.7                                | 3.1                                 | 3.0                                 |
| Forbidden                                           | 0                                   | 0                                  | 0.1                                 | 0.1                                 |

610  
611  
612

613

614

- 615 1. Alonzi DS, et al. (2013) Glycoprotein misfolding in the endoplasmic reticulum:  
616 identification of released oligosaccharides reveals a second ER-associated  
617 degradation pathway for Golgi-retrieved proteins. *Cell Mol Life Sci* 70(15):2799–  
618 2814.
- 619 2. Skelton BW, Stick RV, Stubbs KA, Watts AG, White AH (2004) The  
620 Fluorination (at C5) of Some Derivatives of D-Glucose. *Australian Journal of*  
621 *Chemistry* 57(4):345–353.
- 622 3. Praly J-P, Brard L, Descotes G, Toupet L (1989) Photohalogenation of  
623 glycopyranosyl halides: An expedient route to c-1 gem dihalogenated sugars.  
624 *Tetrahedron* 45(13):4141–4152.
- 625 4. Gottlieb HE, Kotlyar V, Nudelman A (1997) NMR Chemical Shifts of Common  
626 Laboratory Solvents as Trace Impurities. *J Org Chem* 62(21):7512–7515.
- 627 5. Boger DL, Honda T (1994) Total Synthesis of Bleomycin A2 and Related Agents.  
628 4. Synthesis of the Disaccharide Subunit 2-O-(3-O-Carbamoyl- $\alpha$ -D-  
629 mannopyranosyl)-L-gulopyranose and Completion of the Total Synthesis of  
630 Bleomycin A2. *J Am Chem Soc* 116(13):5647–5656.
- 631 6. Vonrhein C, et al. (2011) Data processing and analysis with the autoPROC  
632 toolbox. *Acta Crystallogr D Biol Crystallogr* 67(Pt 4):293–302.
- 633 7. Winter G, Lobley CMC, Prince SM (2013) Decision making in xia2. *Acta*  
634 *Crystallogr D Biol Crystallogr* 69(Pt 7):1260–1273.
- 635 8. Kabsch W (2010) XDS. *Acta Crystallogr D Biol Crystallogr* 66(Pt 2):125–132.
- 636 9. Winn MD, et al. (2011) Overview of the CCP4 suite and current developments.  
637 *Acta Crystallogr D Biol Crystallogr* 67(Pt 4):235–242.
- 638 10. McCoy AJ, et al. (2007) Phaser crystallographic software. *J Appl Crystallogr*  
639 40(Pt 4):658–674.
- 640 11. Keegan RM, Winn MD (2008) MrBUMP: an automated pipeline for molecular  
641 replacement. *Acta Crystallogr D Biol Crystallogr* 64(Pt 1):119–124.
- 642 12. Emsley P, Lohkamp B, Scott WG, Cowtan K (2010) Features and development of  
643 Coot. *Acta Crystallogr D Biol Crystallogr* 66(Pt 4):486–501.
- 644 13. Cowtan K (2006) The Buccaneer software for automated model building. 1.  
645 Tracing protein chains. *Acta Crystallogr D Biol Crystallogr* 62(Pt 9):1002–1011.
- 646 14. Blanc E, et al. (2004) Refinement of severely incomplete structures with maximum

- 647 likelihood in BUSTER-TNT. *Acta Crystallogr D Biol Crystallogr* 60(Pt 12 Pt  
648 1):2210–2221.
- 649 15. Smart OS, et al. (2012) Exploiting structure similarity in refinement: automated  
650 NCS and target-structure restraints in BUSTER. *Acta Crystallogr D Biol*  
651 *Crystallogr* 68(Pt 4):368–380.
- 652 16. Chen VB, Wedell JR, Wenger RK, Ulrich EL, Markley JL (2015) MolProbity for  
653 the masses-of data. *J Biomol NMR* 63(1):77–83.
- 654 17. Brutus A, Sicilia F, Macone A, Cervone F, De Lorenzo G (2010) A domain swap  
655 approach reveals a role of the plant wall-associated kinase 1 (WAK1) as a receptor  
656 of oligogalacturonides. *Proc Natl Acad Sci USA* 107(20):9452–9457.
- 657 18. Batoko H, Zheng HQ, Hawes C, Moore I (2000) A rab1 GTPase is required for  
658 transport between the endoplasmic reticulum and golgi apparatus and for normal  
659 golgi movement in plants. *Plant Cell* 12(11):2201–2218.
- 660 19. Brandizzi F, et al. (2002) The destination for single-pass membrane proteins is  
661 influenced markedly by the length of the hydrophobic domain. *Plant Cell*  
662 14(5):1077–1092.
- 663 20. Chinchilla D, et al. (2007) A flagellin-induced complex of the receptor FLS2 and  
664 BAK1 initiates plant defence. *Nature* 448(7152):497–500.
- 665 21. Petoukhov MV, et al. (2012) New developments in the ATSAS program package  
666 for small-angle scattering data analysis. *J Appl Crystallogr* 45(2):342–350.
- 667 22. Konarev PV, et al. (2003) PRIMUS: a Windows PC-based system for small-angle  
668 scattering data analysis. *J Appl Crystallogr* 36(5):1277–1282.
- 669 23. Svergun DI, IUCr (1992) Determination of the regularization parameter in  
670 indirect-transform methods using perceptual criteria. *J Appl Crystallogr*  
671 25(4):495–503.
- 672 24. Svergun DI (1999) Restoring Low Resolution Structure of Biological  
673 Macromolecules from Solution Scattering Using Simulated Annealing.  
674 *Biophysical Journal* 76(6):2879–2886.
- 675 25. Volkov VV, Svergun DI, IUCr (2003) Uniqueness of ab initio shape determination  
676 in small-angle scattering. *J Appl Crystallogr* 36(3):860–864.
- 677 26. Kozin MB, Svergun DI, IUCr (2001) Automated matching of high- and low-  
678 resolution structural models. *J Appl Crystallogr* 34(1):33–41.
- 679 27. Pettersen EF, et al. (2004) UCSF Chimera--a visualization system for exploratory  
680 research and analysis. *J Comput Chem* 25(13):1605–1612.

- 681 28. Feng J, Romaniouk AV, Samal SK, Vijay IK (2004) Processing enzyme  
682 glucosidase II: proposed catalytic residues and developmental regulation during  
683 the ontogeny of the mouse mammary gland. *Glycobiology* 14(10):909–921.
- 684 29. Lu X, et al. (2009) Uncoupling of sustained MAMP receptor signaling from early  
685 outputs in an Arabidopsis endoplasmic reticulum glucosidase II allele. *Proc Natl*  
686 *Acad Sci USA* 106(52):22522–22527.
- 687 30. Stigliano ID, Alculumbre SG, Labriola CA, Parodi AJ, D’Alessio C (2011)  
688 Glucosidase II and N-glycan mannose content regulate the half-lives of  
689 monoglucosylated species in vivo. *Mol Biol Cell* 22(11):1810–1823.
- 690 31. Müller P, Köpke S, Sheldrick GM (2003) Is the bond-valence method able to  
691 identify metal atoms in protein structures? *Acta Crystallogr D Biol Crystallogr*  
692 59(Pt 1):32–37.
- 693 32. Tamura K, et al. (2003) Why green fluorescent fusion proteins have not been  
694 observed in the vacuoles of higher plants. *Plant J* 35(4):545–555.
- 695 33. Ashkenazy H, Erez E, Martz E, Pupko T, Ben-Tal N (2010) ConSurf 2010:  
696 calculating evolutionary conservation in sequence and structure of proteins and  
697 nucleic acids. *Nucleic Acids Res* 38(Web Server issue):W529–33.
- 698 34. Robert X, Gouet P (2014) Deciphering key features in protein structures with the  
699 new ENDscript server. *Nucleic Acids Res* 42(Web Server issue):W320–4.
- 700 35. Schrodinger, LLC (2015) Maestro.

701
